# Supplementary material for: VOCs emission profiles from rural cooking and heatingin Guanzhong Plain, China and its potential effect onregional O&lt;sub&gt;3&lt;/sub&gt; and SOA formation
Source: Copernicus journal article supplement (doi:10.5194/acp-2018-36), 2018-03-07
Supplement: Supplementary file [file Appendix with highlight1.pdf › Appendix with highlight1.pdf]

1 **Supplementary Figure Legends:**

2 **Figure S1** Location of 3 sampling villages selected in this study

3 **Figure S2** Stoves used in this study: a) Heated Kang b) Traditional coal stove c)

4 Semi-gasifier stove

5 **Figure S3** Profiles of VOCs emitted from heating and cooking activities

6

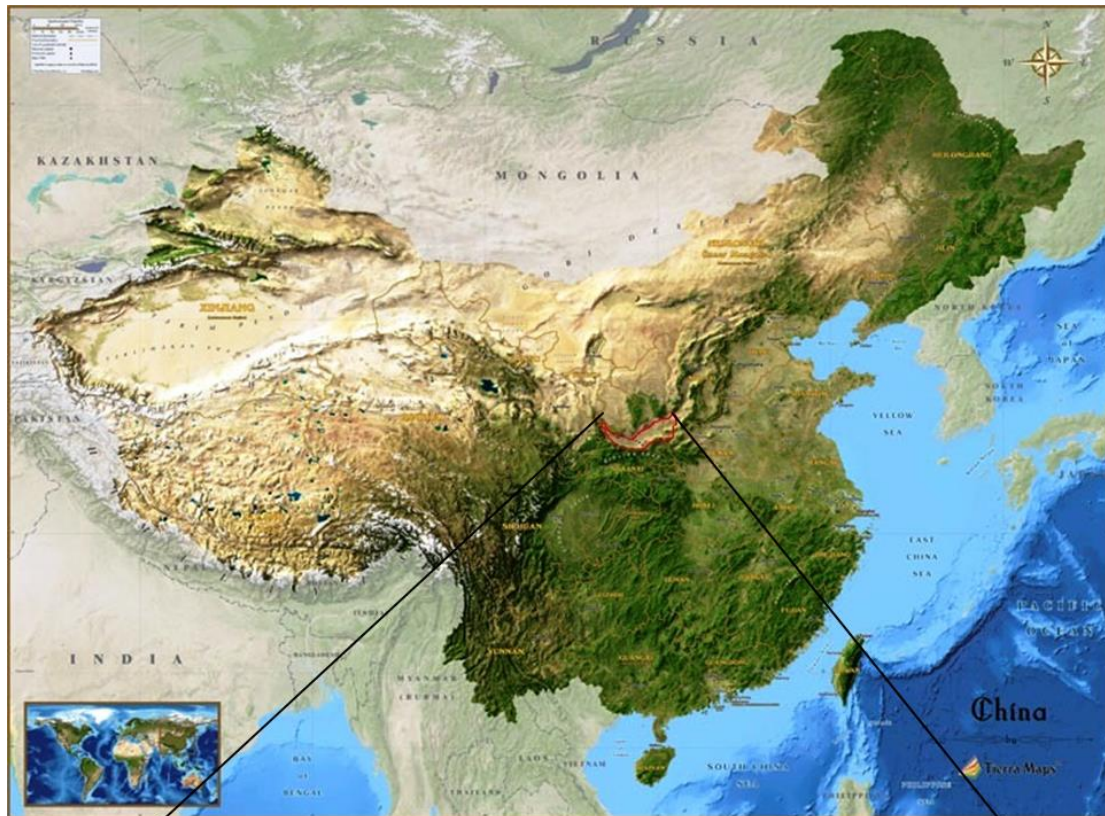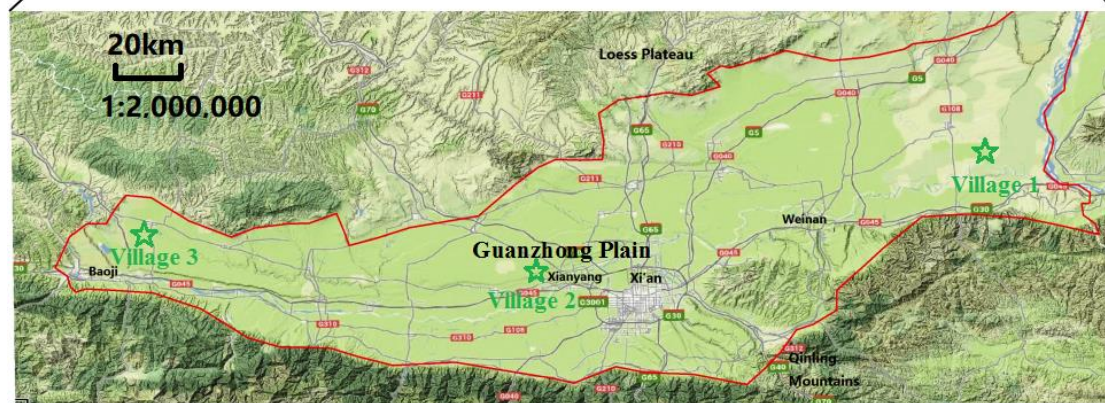

Figure S1

7

8

9

10

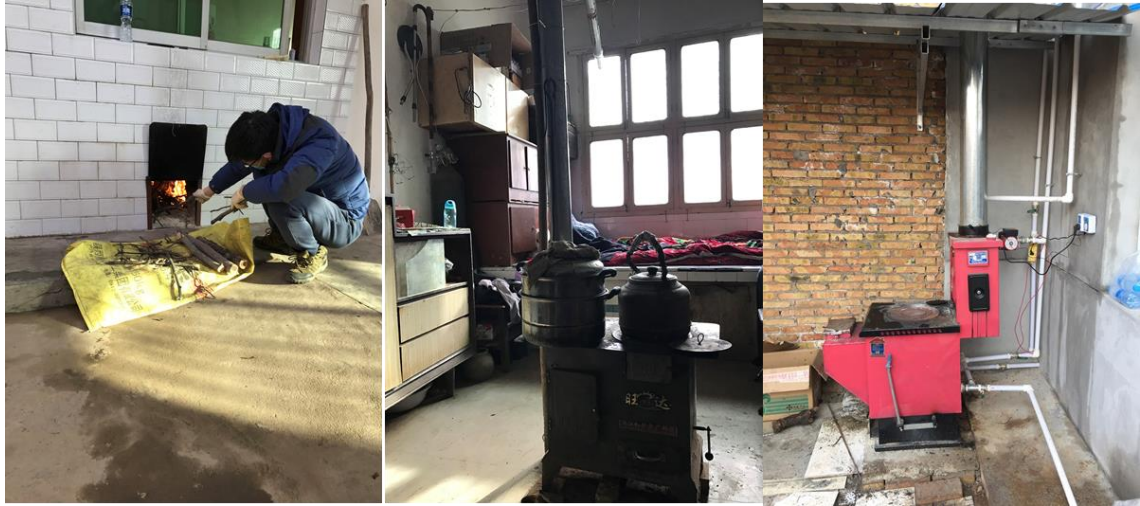

11

12

13

**Figure S2**

14

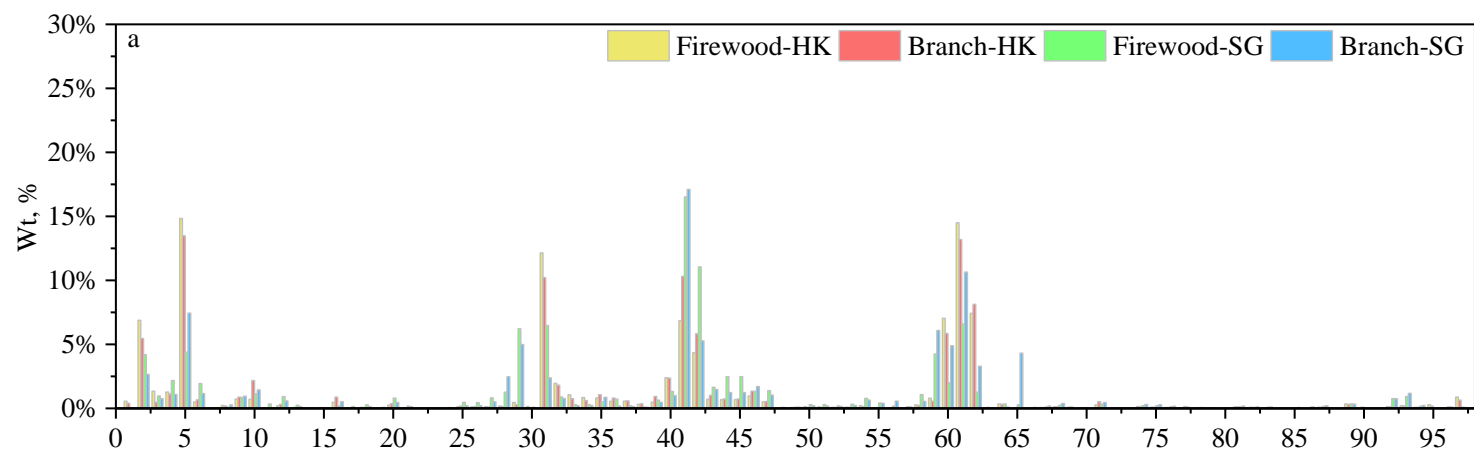

15

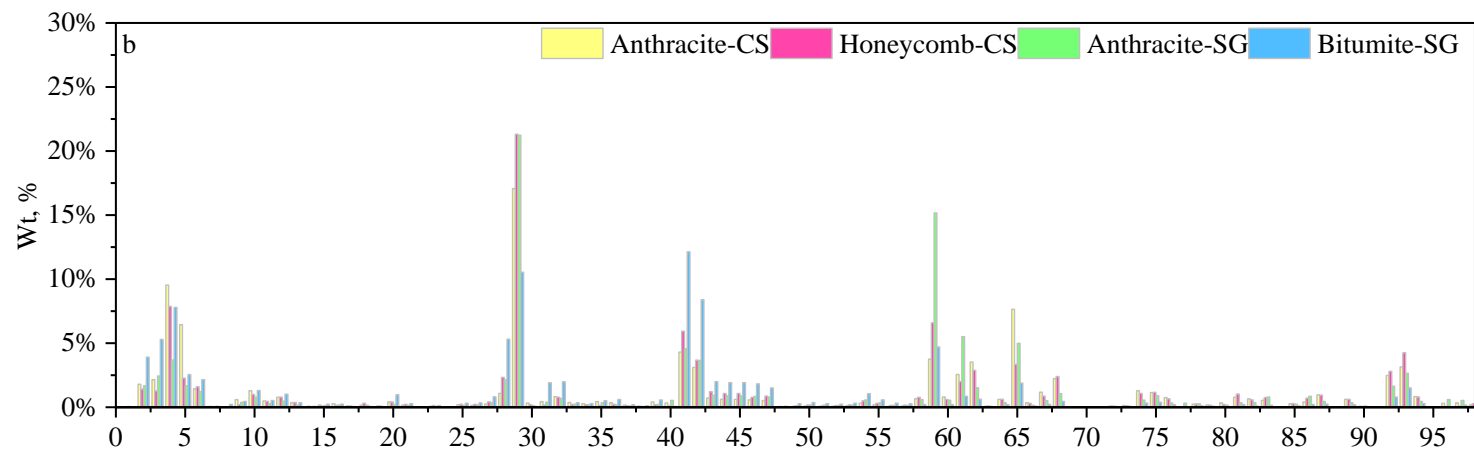

16

17

18  
19  
20

**Figure S3**

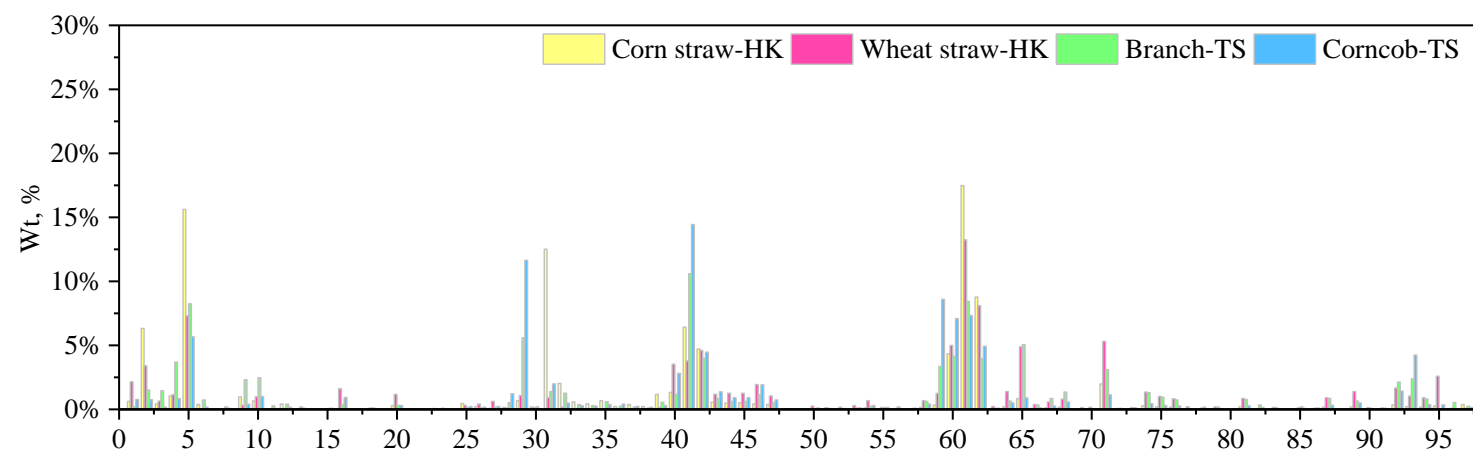

21  
22

**Table S1** Solid fuel and stoves used in this study

|              |                        |              |                     |             |                           |             |
|--------------|------------------------|--------------|---------------------|-------------|---------------------------|-------------|
| Purpose      | Heating                |              |                     |             |                           |             |
| Fuel type    | Wood                   |              |                     |             | Straw                     |             |
| Stove type   | Heated Kang            |              | Semi-gasifier Stove |             | Heated Kang               |             |
| Fuel used    | Firewood               | Branch       | Firewood            | Branch      | Maize straw               | Wheat straw |
| Abbreviation | Firewood-HK            | Branch-HK    | Firewood-SG         | Branch-SG   | Maize-HK                  | Wheat-HK    |
| Sample No.   | 2                      | 2            | 2                   | 2           | 2                         | 2           |
| Purpose      | Heating                |              |                     |             | Cooking                   |             |
| Fuel type    | Coal                   |              |                     |             | Wood and straw            |             |
| Stove type   | Traditional coal stove |              | Semi-gasifier stove |             | Traditional cooking stove |             |
| Fuel used    | Anthracite             | Honeycomb    | Anthracite          | Bitumite    | Branch                    | Corn cob    |
| Abbreviation | Anthracite-CS          | Honeycomb-CS | Anthracite-SG       | Bitumite-SG | Branch-TS                 | Corn cob-TS |
| Sample No.   | 2                      | 2            | 2                   | 2           | 2                         | 2           |

Table S2 MDL of VOC species in analysis method used in this study (ppbv)

| No. | Species                | MDL (ppbv) | No. | Species                   | MDL (ppbv) |
|-----|------------------------|------------|-----|---------------------------|------------|
| 1   | Ethane                 | 0.033      | 50  | m-Ethyltoluene            | 0.001      |
| 2   | Propane                | 0.019      | 51  | p-Ethyltoluene            | 0.002      |
| 3   | Isobutane              | 0.024      | 52  | 1,3,5-Trimethylbenzene    | 0.003      |
| 4   | n-Butane               | 0.017      | 53  | o-Ethyltoluene            | 0.004      |
| 5   | iso-Pentane            | 0.002      | 54  | 1,2,4-Trimethylbenzene    | 0.005      |
| 6   | n-Pentane              | 0.020      | 55  | 1,2,3-Trimethylbenzene    | 0.006      |
| 7   | 2,2-Dimethylbutane     | 0.004      | 56  | m-Diethylbenzene          | 0.007      |
| 8   | Cyclopentane           | 0.013      | 57  | p-Diethylbenzene          | 0.008      |
| 9   | 2,3-Dimethylbutane     | 0.004      | 58  | 4-Ethyltoluene            | 0.009      |
| 10  | 2-Methylpentane        | 0.024      | 59  | Naphthalene               | 0.010      |
| 11  | 3-Methylpentane        | 0.006      | 60  | Acrolein                  | 0.011      |
| 12  | n-Hexane               | 0.019      | 61  | Acetone                   | 0.012      |
| 13  | Methylcyclopentane     | 0.008      | 62  | Methyl ethyl ketone       | 0.013      |
| 14  | 2,4-Dimethylpentane    | 0.004      | 63  | Methyl Isobutyl Ketone    | 0.014      |
| 15  | Cyclohexane            | 0.005      | 64  | Methyl butyl ketone       | 0.015      |
| 16  | 2-Methylhexane         | 0.007      | 65  | Ethanol                   | 0.016      |
| 17  | 2,3-Dimethylpentane    | 0.007      | 66  | Isopropyl Alcohol         | 0.017      |
| 18  | 3-Methylhexane         | 0.006      | 67  | Methyl tert-butyl ether   | 0.018      |
| 19  | 2,2,4-Trimethylpentane | 0.010      | 68  | Ethyl Acetate             | 0.019      |
| 20  | n-Heptane              | 0.007      | 69  | Methyl Methacrylate       | 0.020      |
| 21  | Methylcyclohexane      | 0.005      | 70  | Freon-12                  | 0.021      |
| 22  | 2,3,4-Trimethylpentane | 0.007      | 71  | Chloromethane             | 0.022      |
| 23  | 2-Methylheptane        | 0.005      | 72  | Freon-114                 | 0.023      |
| 24  | 3-Methylheptane        | 0.006      | 73  | Vinyl chloride            | 0.024      |
| 25  | n-Octane               | 0.005      | 74  | Bromomethane              | 0.025      |
| 26  | n-Nonane               | 0.004      | 75  | Freon-11                  | 0.026      |
| 27  | n-Decane               | 0.003      | 76  | 1,1-Dichloroethene        | 0.027      |
| 28  | Undecane               | 0.004      | 77  | Methylene Chloride        | 0.028      |
| 29  | Dodecane               | 0.004      | 78  | Freon-113                 | 0.029      |
| 30  | Ethylene               | 0.039      | 79  | trans-1,2-Dichloroethene  | 0.030      |
| 31  | Propylene              | 0.042      | 80  | 1,1-Dichloroethane        | 0.031      |
| 32  | 1-Butene               | 0.008      | 81  | cis-1,2-Dichloroethene    | 0.032      |
| 33  | trans-2-Butene         | 0.010      | 82  | Chloroform                | 0.033      |
| 34  | cis-2-Butene           | 0.006      | 83  | 1,2-Dichloroethane        | 0.034      |
| 35  | Isoprene               | 0.005      | 84  | 1,1,1-Trichloroethane     | 0.035      |
| 36  | 1-Pentene              | 0.013      | 85  | Carbon Tetrachloride      | 0.036      |
| 37  | trans-2-Pentene        | 0.012      | 86  | 1,2-Dichloropropane       | 0.037      |
| 38  | cis-2-Pentene          | 0.006      | 87  | Trichloroethene           | 0.038      |
| 39  | 1-Hexene               | 0.003      | 88  | cis-1,3-Dichloropropene   | 0.039      |
| 40  | 1,3-Butadiene          | 0.029      | 89  | 1,1,2-Trichloroethane     | 0.040      |
| 41  | Benzene                | 0.015      | 90  | 1,1,2,2-Tetrachloroethane | 0.041      |
| 42  | Toluene                | 0.022      | 91  | Benzyl Chloride           | 0.042      |
| 43  | Ethylbenzene           | 0.004      | 92  | 1,3-Dichlorobenzene       | 0.043      |
| 44  | m-Xylene               | 0.012      | 93  | 1,4-Dichlorobenzene       | 0.044      |
| 45  | p-Xylene               | 0.012      | 94  | 1,2-Dichlorobenzene       | 0.045      |

|    |                  |       |    |                  |       |
|----|------------------|-------|----|------------------|-------|
| 46 | Styrene          | 0.006 | 95 | Acetylene        | 0.046 |
| 47 | o-Xylene         | 0.003 | 96 | Carbon disulfide | 0.047 |
| 48 | Isopropylbenzene | 0.004 | 97 | Tetrahydrofuran  | 0.048 |
| 49 | n-Propylbenzene  | 0.003 | 98 | 1,4-Dioxane      | 0.049 |

---



24 Table S3 Background concentrations of 98 VOC species in three sampling sites ( $\mu\text{g}\cdot\text{m}^{-3}$ )

| No. | Species                | Village<br>1 | Village<br>2 | Village<br>3 | No. | Species                   | Village<br>1 | Village<br>2 | Village<br>3 |
|-----|------------------------|--------------|--------------|--------------|-----|---------------------------|--------------|--------------|--------------|
| 1   | Ethane                 | 0.1          | 1.5          | 4.8          | 50  | m-Ethyltoluene            | 0.0          | 0.0          | 0.0          |
| 2   | Propane                | 0.0          | 1.8          | 0.9          | 51  | p-Ethyltoluene            | 0.0          | 0.0          | 0.0          |
| 3   | Isobutane              | 4.5          | 0.9          | 0.0          | 52  | 1,3,5-Trimethylbenzene    | 0.0          | 0.0          | 0.0          |
| 4   | n-Butane               | 0.0          | 0.7          | 0.0          | 53  | o-Ethyltoluene            | 0.0          | 0.0          | 0.0          |
| 5   | iso-Pentane            | 2.5          | 0.1          | 0.9          | 54  | 1,2,4-Trimethylbenzene    | 0.0          | 0.0          | 0.0          |
| 6   | n-Pentane              | 0.0          | 0.0          | 0.0          | 55  | 1,2,3-Trimethylbenzene    | 0.0          | 0.0          | 0.0          |
| 7   | 2,2-Dimethylbutane     | 0.0          | 0.0          | 0.0          | 56  | m-Diethylbenzene          | 0.0          | 0.0          | 0.0          |
| 8   | Cyclopentane           | 0.0          | 3.2          | 0.0          | 57  | p-Diethylbenzene          | 0.0          | 0.0          | 0.0          |
| 9   | 2,3-Dimethylbutane     | 0.0          | 0.0          | 0.0          | 58  | 4-Ethyltoluene            | 0.2          | 0.1          | 0.0          |
| 10  | 2-Methylpentane        | 0.0          | 0.0          | 0.0          | 59  | Naphthalene               | 0.0          | 0.0          | 0.0          |
| 11  | 3-Methylpentane        | 0.0          | 0.0          | 0.0          | 60  | Acrolein                  | 0.2          | 0.0          | 0.0          |
| 12  | n-Hexane               | 0.2          | 0.0          | 0.0          | 61  | Acetone                   | 1.4          | 0.0          | 0.3          |
| 13  | Methylcyclopentane     | 0.0          | 0.0          | 0.0          | 62  | Methyl ethyl ketone       | 0.0          | 0.0          | 0.0          |
| 14  | 2,4-Dimethylpentane    | 0.0          | 0.0          | 0.0          | 63  | Methyl Isobutyl Ketone    | 0.0          | 0.0          | 0.0          |
| 15  | Cyclohexane            | 0.0          | 0.0          | 0.0          | 64  | Methyl butyl ketone       | 10.0         | 1.6          | 0.4          |
| 16  | 2-Methylhexane         | 0.0          | 0.0          | 0.0          | 65  | Ethanol                   | 37.9         | 0.0          | 0.1          |
| 17  | 2,3-Dimethylpentane    | 0.0          | 0.0          | 0.0          | 66  | Isopropyl Alcohol         | 0.0          | 0.0          | 0.0          |
| 18  | 3-Methylhexane         | 0.0          | 0.0          | 0.0          | 67  | Methyl tert-butyl ether   | 0.0          | 0.0          | 0.0          |
| 19  | 2,2,4-Trimethylpentane | 0.0          | 0.0          | 0.0          | 68  | Ethyl Acetate             | 0.0          | 0.0          | 0.0          |
| 20  | n-Heptane              | 0.0          | 0.0          | 0.0          | 69  | Methyl Methacrylate       | 0.0          | 0.0          | 0.0          |
| 21  | Methylcyclohexane      | 0.0          | 0.0          | 0.0          | 70  | Freon-12                  | 0.0          | 0.0          | 0.0          |
| 22  | 2,3,4-Trimethylpentane | 0.0          | 0.0          | 0.0          | 71  | Chloromethane             | 0.5          | 0.7          | 0.9          |
| 23  | 2-Methylheptane        | 0.0          | 0.0          | 0.0          | 72  | Freon-114                 | 0.0          | 0.0          | 0.0          |
| 24  | 3-Methylheptane        | 0.0          | 0.0          | 0.0          | 73  | Vinyl chloride            | 0.0          | 0.0          | 0.0          |
| 25  | n-Octane               | 0.0          | 0.0          | 0.0          | 74  | Bromomethane              | 0.0          | 0.0          | 0.0          |
| 26  | n-Nonane               | 0.0          | 0.0          | 0.0          | 75  | Freon-11                  | 0.0          | 1.0          | 0.0          |
| 27  | n-Decane               | 0.0          | 0.0          | 0.0          | 76  | 1,1-Dichloroethene        | 0.0          | 0.0          | 0.0          |
| 28  | Undecane               | 0.0          | 0.0          | 0.0          | 77  | Methylene Chloride        | 0.2          | 0.2          | 0.0          |
| 29  | Dodecane               | 0.0          | 0.0          | 0.0          | 78  | Freon-113                 | 0.0          | 0.0          | 0.0          |
| 30  | Ethylene               | 0.1          | 0.7          | 0.1          | 79  | trans-1,2-Dichloroethene  | 0.0          | 0.0          | 0.0          |
| 31  | Propylene              | 1.0          | 1.6          | 0.8          | 80  | 1,1-Dichloroethane        | 0.0          | 0.0          | 0.0          |
| 32  | 1-Butene               | 1.1          | 0.0          | 0.2          | 81  | cis-1,2-Dichloroethene    | 0.0          | 0.0          | 0.0          |
| 33  | trans-2-Butene         | 0.0          | 0.1          | 0.0          | 82  | Chloroform                | 0.0          | 0.0          | 0.0          |
| 34  | cis-2-Butene           | 0.0          | 0.1          | 0.0          | 83  | 1,2-Dichloroethane        | 0.0          | 0.0          | 0.0          |
| 35  | Isoprene               | 0.0          | 0.0          | 0.0          | 84  | 1,1,1-Trichloroethane     | 0.0          | 0.0          | 0.0          |
| 36  | 1-Pentene              | 0.0          | 0.0          | 0.0          | 85  | Carbon Tetrachloride      | 8.8          | 5.0          | 0.9          |
| 37  | trans-2-Pentene        | 0.0          | 0.0          | 0.0          | 86  | 1,2-Dichloropropane       | 0.0          | 0.0          | 0.0          |
| 38  | cis-2-Pentene          | 0.0          | 0.0          | 0.0          | 87  | Trichloroethene           | 0.0          | 0.0          | 0.0          |
| 39  | 1-Hexene               | 0.0          | 0.0          | 0.0          | 88  | cis-1,3-Dichloropropene   | 0.0          | 0.0          | 0.0          |
| 40  | 1,3-Butadiene          | 1.0          | 0.2          | 0.0          | 89  | 1,1,2-Trichloroethane     | 0.0          | 0.0          | 0.0          |
| 41  | Benzene                | 2.8          | 1.6          | 0.3          | 90  | 1,1,2,2-Tetrachloroethane | 0.9          | 0.4          | 0.0          |
| 42  | Toluene                | 1.0          | 0.2          | 0.0          | 91  | Benzyl Chloride           | 0.0          | 0.0          | 0.0          |
| 43  | Ethylbenzene           | 0.1          | 0.0          | 0.0          | 92  | 1,3-Dichlorobenzene       | 0.3          | 0.0          | 0.0          |
| 44  | m-Xylene               | 0.8          | 0.2          | 0.0          | 93  | 1,4-Dichlorobenzene       | 0.0          | 0.0          | 0.0          |
| 45  | p-Xylene               | 0.2          | 0.0          | 0.0          | 94  | 1,2-Dichlorobenzene       | 0.0          | 0.1          | 0.0          |

|    |                  |     |     |     |    |                  |     |     |     |
|----|------------------|-----|-----|-----|----|------------------|-----|-----|-----|
| 46 | Styrene          | 0.2 | 0.1 | 0.0 | 95 | Acetylene        | 3.6 | 4.0 | 6.4 |
| 47 | o-Xylene         | 0.1 | 0.0 | 0.0 | 96 | Carbon disulfide | 0.1 | 1.1 | 0.1 |
| 48 | Isopropylbenzene | 0.0 | 0.0 | 0.0 | 97 | Tetrahydrofuran  | 0.0 | 0.0 | 0.0 |
| 49 | n-Propylbenzene  | 0.1 | 0.0 | 0.0 | 98 | 1,4-Dioxane      | 0.0 | 0.0 | 0.0 |

---

25

26

Table S4 Concentration of VOC species measured in diluted smoke ( $\mu\text{g}\cdot\text{m}^{-3}$ )

| No. | Species                | Firewood-HK1 |      | Branch -HK |      | Corn straw- HK |      | Wheat straw- HK |      | Branch - TS |     | Corncob - TS |      |
|-----|------------------------|--------------|------|------------|------|----------------|------|-----------------|------|-------------|-----|--------------|------|
|     |                        | Avg          | SD   | Avg        | SD   | Avg            | SD   | Avg             | SD   | Avg         | SD  | Avg          | SD   |
| 1   | Ethane                 | 20.8         | 7.1  | 14.9       | 2.5  | 8.3            | 5.7  | 5.3             | 4.0  | 0.7         | 0.8 | 7.1          | 10.0 |
| 2   | Propane                | 255          | 68.5 | 235        | 123  | 90.4           | 3.0  | 8.9             | 4.4  | 4.9         | 0.1 | 6.9          | 9.8  |
| 3   | Isobutane              | 49.9         | 41.1 | 21.0       | 13.2 | 6.5            | 2.7  | 1.8             | 0.6  | 4.7         | 3.0 | 1.7          | 2.4  |
| 4   | n-Butane               | 47.4         | 12.9 | 49.4       | 29.1 | 15.4           | 6.7  | 3.1             | 0.8  | 11.9        | 2.2 | 7.7          | 10.9 |
| 5   | iso-Pentane            | 550          | 119  | 572        | 266  | 217            | 63.3 | 25.3            | 17.2 | 26.7        | 2.2 | 51.8         | 30.2 |
| 6   | n-Pentane              | 18.5         | 2.9  | 28.9       | 15.8 | 4.9            | 6.7  | 0.0             | 0.0  | 2.4         | 0.0 | 1.6          | 2.3  |
| 7   | 2,2-Dimethylbutane     | 0.1          | 0.0  | 0.2        | 0.0  | 0.0            | 0.0  | 0.0             | 0.0  | 0.1         | 0.0 | 0.0          | 0.1  |
| 8   | Cyclopentane           | 8.4          | 2.9  | 7.3        | 1.6  | 2.5            | 3.6  | 0.4             | 0.5  | 0.0         | 0.0 | 0.0          | 0.0  |
| 9   | 2,3-Dimethylbutane     | 27.0         | 0.8  | 37.2       | 15.6 | 12.7           | 12.3 | 1.4             | 1.9  | 7.5         | 3.6 | 3.7          | 4.1  |
| 10  | 2-Methylpentane        | 26.1         | 30.8 | 81.2       | 9.4  | 8.7            | 7.5  | 3.0             | 0.7  | 8.0         | 3.2 | 9.2          | 11.6 |
| 11  | 3-Methylpentane        | 1.4          | 0.4  | 2.0        | 0.7  | 0.2            | 0.2  | 0.1             | 0.1  | 0.9         | 0.2 | 0.7          | 0.1  |
| 12  | n-Hexane               | 7.8          | 0.4  | 13.5       | 7.0  | 5.7            | 3.3  | 0.3             | 0.4  | 1.3         | 0.2 | 1.6          | 0.1  |
| 13  | Methylcyclopentane     | 1.9          | 0.3  | 3.2        | 1.2  | 0.4            | 0.4  | 0.1             | 0.1  | 0.6         | 0.1 | 0.8          | 0.4  |
| 14  | 2,4-Dimethylpentane    | 0.3          | 0.1  | 0.3        | 0.1  | 0.5            | 0.6  | 0.0             | 0.1  | 0.1         | 0.1 | 0.2          | 0.1  |
| 15  | Cyclohexane            | 2.0          | 0.2  | 2.4        | 0.9  | 0.4            | 0.3  | 0.2             | 0.2  | 0.2         | 0.1 | 0.8          | 0.8  |
| 16  | 2-Methylhexane         | 17.4         | 21.4 | 36.6       | 14.2 | 0.7            | 0.9  | 5.7             | 4.5  | 1.2         | 0.6 | 8.5          | 8.3  |
| 17  | 2,3-Dimethylpentane    | 1.0          | 0.1  | 1.6        | 0.7  | 0.4            | 0.6  | 0.0             | 0.0  | 0.2         | 0.0 | 0.1          | 0.1  |
| 18  | 3-Methylhexane         | 2.8          | 0.3  | 3.1        | 2.0  | 0.6            | 0.9  | 0.2             | 0.2  | 0.3         | 0.2 | 1.0          | 0.7  |
| 19  | 2,2,4-Trimethylpentane | 0.1          | 0.0  | 0.2        | 0.1  | 0.7            | 1.0  | 0.0             | 0.0  | 0.1         | 0.0 | 0.3          | 0.1  |
| 20  | n-Heptane              | 9.5          | 0.6  | 15.6       | 7.7  | 4.1            | 1.6  | 4.2             | 3.3  | 1.0         | 0.2 | 2.7          | 2.2  |
| 21  | Methylcyclohexane      | 0.9          | 0.2  | 1.9        | 0.5  | 0.1            | 0.1  | 0.2             | 0.2  | 0.2         | 0.2 | 0.2          | 0.1  |
| 22  | 2,3,4-Trimethylpentane | 0.3          | 0.2  | 0.4        | 0.2  | 0.2            | 0.2  | 0.0             | 0.1  | 0.0         | 0.0 | 0.1          | 0.2  |
| 23  | 2-Methylheptane        | 0.5          | 0.1  | 0.4        | 0.0  | 0.9            | 0.8  | 0.2             | 0.3  | 0.1         | 0.2 | 0.8          | 1.0  |
| 24  | 3-Methylheptane        | 0.2          | 0.1  | 0.3        | 0.1  | 0.1            | 0.1  | 0.0             | 0.0  | 0.1         | 0.0 | 0.2          | 0.3  |

|    |                        |      |      |      |      |      |      |      |     |      |     |      |      |
|----|------------------------|------|------|------|------|------|------|------|-----|------|-----|------|------|
| 25 | n-Octane               | 5.2  | 0.3  | 8.1  | 3.8  | 5.8  | 6.4  | 1.0  | 0.4 | 0.4  | 0.1 | 2.0  | 2.2  |
| 26 | n-Nonane               | 4.8  | 0.7  | 6.0  | 2.7  | 2.8  | 3.4  | 1.3  | 0.5 | 0.4  | 0.0 | 1.6  | 1.9  |
| 27 | n-Decane               | 5.2  | 0.6  | 4.7  | 0.5  | 1.0  | 0.6  | 1.9  | 0.5 | 0.6  | 0.1 | 2.1  | 2.2  |
| 28 | Undecane               | 7.0  | 0.4  | 4.8  | 0.4  | 2.4  | 2.2  | 0.4  | 0.5 | 1.7  | 1.9 | 11.2 | 10.7 |
| 29 | Dodecane               | 17.1 | 0.3  | 12.1 | 6.2  | 10.2 | 5.5  | 2.9  | 1.1 | 18.1 | 6.5 | 106  | 98.8 |
| 30 | Ethylene               | 5.0  | 5.4  | 0.0  | 0.0  | 2.5  | 2.4  | 0.5  | 0.5 | 0.6  | 0.0 | 0.3  | 0.4  |
| 31 | Propylene              | 451  | 110  | 448  | 270  | 177  | 18.9 | 2.9  | 1.2 | 4.5  | 1.3 | 18.2 | 25.7 |
| 32 | 1-Butene               | 72.6 | 23.9 | 81.8 | 57.5 | 29.3 | 3.7  | 0.8  | 0.9 | 4.1  | 0.0 | 4.5  | 6.3  |
| 33 | trans-2-Butene         | 39.2 | 11.6 | 33.8 | 23.1 | 8.4  | 0.3  | 0.2  | 0.3 | 1.2  | 0.2 | 2.7  | 3.8  |
| 34 | cis-2-Butene           | 31.2 | 11.0 | 27.3 | 18.9 | 6.1  | 0.0  | 0.2  | 0.2 | 0.9  | 0.2 | 2.3  | 2.8  |
| 35 | Isoprene               | 30.0 | 11.6 | 46.6 | 26.4 | 9.0  | 6.9  | 0.1  | 0.2 | 1.9  | 0.4 | 3.4  | 4.9  |
| 36 | 1-Pentene              | 20.6 | 3.5  | 35.6 | 22.0 | 3.0  | 2.6  | 0.3  | 0.3 | 0.8  | 0.8 | 3.7  | 0.7  |
| 37 | trans-2-Pentene        | 21.0 | 6.0  | 25.6 | 14.9 | 4.9  | 5.0  | 0.1  | 0.2 | 0.6  | 0.2 | 2.1  | 0.5  |
| 38 | cis-2-Pentene          | 11.5 | 3.5  | 15.1 | 8.2  | 2.8  | 2.9  | 0.1  | 0.1 | 0.4  | 0.1 | 1.6  | 0.0  |
| 39 | 1-Hexene               | 18.0 | 1.6  | 42.0 | 29.7 | 15.3 | 14.5 | 0.6  | 0.7 | 1.8  | 0.2 | 2.7  | 0.8  |
| 40 | 1,3-Butadiene          | 88.9 | 28.1 | 105  | 66.7 | 18.9 | 0.4  | 10.3 | 0.4 | 3.8  | 0.9 | 13.2 | 18.6 |
| 41 | Benzene                | 254  | 5.3  | 406  | 57.1 | 88.9 | 30.2 | 11.0 | 0.1 | 34.2 | 1.0 | 132  | 54.5 |
| 42 | Toluene                | 161  | 12.5 | 237  | 63.9 | 62.8 | 51.3 | 13.7 | 1.4 | 12.9 | 2.9 | 40.9 | 26.8 |
| 43 | Ethylbenzene           | 26.7 | 1.4  | 40.4 | 7.0  | 7.4  | 7.6  | 3.6  | 0.5 | 2.7  | 0.8 | 12.5 | 13.3 |
| 44 | m-Xylene               | 103  | 7.8  | 117  | 15.2 | 20.3 | 28.8 | 14.4 | 0.2 | 7.6  | 2.5 | 33.1 | 36.0 |
| 45 | p-Xylene               | 52.2 | 4.0  | 59.3 | 7.8  | 10.2 | 14.5 | 7.0  | 0.2 | 3.6  | 1.3 | 16.6 | 18.4 |
| 46 | Styrene                | 35.9 | 1.4  | 50.8 | 3.1  | 5.8  | 2.7  | 5.6  | 0.1 | 3.7  | 1.3 | 17.5 | 19.1 |
| 47 | o-Xylene               | 19.1 | 1.3  | 20.8 | 1.3  | 5.2  | 3.2  | 3.0  | 0.0 | 1.6  | 0.5 | 6.7  | 7.1  |
| 48 | Isopropylbenzene       | 1.2  | 0.1  | 1.7  | 0.1  | 0.2  | 0.3  | 0.1  | 0.1 | 0.1  | 0.0 | 0.6  | 0.6  |
| 49 | n-Propylbenzene        | 2.7  | 0.1  | 2.7  | 0.2  | 0.1  | 0.1  | 0.2  | 0.0 | 0.1  | 0.1 | 0.3  | 0.1  |
| 50 | m-Ethyltoluene         | 5.1  | 2.3  | 2.7  | 0.4  | 0.6  | 0.1  | 0.7  | 0.0 | 0.2  | 0.0 | 1.0  | 1.0  |
| 51 | p-Ethyltoluene         | 4.5  | 3.1  | 2.7  | 0.4  | 0.4  | 0.0  | 0.4  | 0.0 | 0.2  | 0.0 | 0.6  | 0.6  |
| 52 | 1,3,5-Trimethylbenzene | 3.1  | 0.1  | 2.4  | 0.3  | 0.5  | 0.0  | 0.5  | 0.0 | 0.2  | 0.1 | 0.7  | 0.7  |
| 53 | o-Ethyltoluene         | 3.5  | 0.0  | 2.8  | 0.6  | 0.7  | 0.1  | 0.9  | 0.0 | 0.3  | 0.1 | 1.0  | 1.1  |

|    |                          |      |      |      |      |      |      |      |     |      |     |      |     |
|----|--------------------------|------|------|------|------|------|------|------|-----|------|-----|------|-----|
| 54 | 1,2,4-Trimethylbenzene   | 7.7  | 0.0  | 4.9  | 1.5  | 1.7  | 0.9  | 1.9  | 0.4 | 0.8  | 0.1 | 2.6  | 2.8 |
| 55 | 1,2,3-Trimethylbenzene   | 2.2  | 0.0  | 1.3  | 0.5  | 0.5  | 0.2  | 0.5  | 0.1 | 0.4  | 0.1 | 1.5  | 1.5 |
| 56 | m-Diethylbenzene         | 0.6  | 0.5  | 0.6  | 0.2  | 0.2  | 0.1  | 0.2  | 0.0 | 0.6  | 0.6 | 0.5  | 0.5 |
| 57 | p-Diethylbenzene         | 0.1  | 0.0  | 0.3  | 0.4  | 0.2  | 0.0  | 0.1  | 0.1 | 0.2  | 0.0 | 0.8  | 0.8 |
| 58 | 4-Ethyltoluene           | 10.2 | 0.0  | 8.2  | 1.1  | 2.1  | 1.1  | 2.3  | 1.2 | 2.0  | 0.1 | 3.9  | 2.7 |
| 59 | Naphthalene              | 5.3  | 1.1  | 3.8  | 0.2  | 0.7  | 0.7  | 0.7  | 0.6 | 1.9  | 0.3 | 8.2  | 9.2 |
| 60 | Acrolein                 | 261  | 52.3 | 262  | 179  | 62.1 | 0.4  | 14.4 | 0.2 | 13.4 | 0.4 | 64.8 | 5.1 |
| 61 | Acetone                  | 538  | 116  | 559  | 260  | 248  | 12.5 | 38.3 | 0.4 | 27.2 | 0.9 | 67.1 | 6.1 |
| 62 | Methyl ethyl ketone      | 4.3  | 0.0  | 4.5  | 0.2  | 2.9  | 0.6  | 2.5  | 0.0 | 2.5  | 0.0 | 2.5  | 0.0 |
| 63 | Methyl Isobutyl Ketone   | 0.1  | 0.0  | 0.1  | 0.0  | 0.1  | 0.0  | 0.1  | 0.0 | 0.1  | 0.0 | 0.1  | 0.0 |
| 64 | Methyl butyl ketone      | 12.6 | 1.7  | 12.2 | 0.7  | 2.6  | 1.7  | 5.1  | 4.3 | 2.1  | 0.2 | 4.5  | 3.7 |
| 65 | Ethanol                  | 0.0  | 0.0  | 12.9 | 18.3 | 12.1 | 0.0  | 13.9 | 1.2 | 16.3 | 4.0 | 8.2  | 1.0 |
| 66 | Isopropyl Alcohol        | 1.1  | 0.0  | 1.1  | 0.0  | 1.1  | 0.0  | 1.1  | 0.0 | 1.1  | 0.0 | 1.1  | 0.0 |
| 67 | Methyl tert-butyl ether  | 2.4  | 0.0  | 2.3  | 0.1  | 1.7  | 0.1  | 1.7  | 0.0 | 2.8  | 0.4 | 2.4  | 0.2 |
| 68 | Ethyl Acetate            | 32.8 | 4.1  | 25.6 | 4.0  | 5.3  | 0.4  | 0.4  | 0.5 | 0.8  | 0.1 | 1.4  | 0.6 |
| 69 | Methyl Methacrylate      | 3.4  | 0.0  | 4.7  | 2.2  | 0.5  | 0.7  | 0.0  | 0.0 | 0.0  | 0.0 | 1.2  | 1.8 |
| 70 | Freon-12                 | 2.1  | 0.2  | 1.7  | 0.2  | 0.2  | 0.0  | 0.5  | 0.3 | 0.0  | 0.0 | 0.0  | 0.0 |
| 71 | Chloromethane            | 10.0 | 3.2  | 21.8 | 8.4  | 28.4 | 0.9  | 16.0 | 2.6 | 10.0 | 0.0 | 10.4 | 0.8 |
| 72 | Freon-114                | 0.3  | 0.0  | 0.3  | 0.0  | 0.2  | 0.0  | 0.2  | 0.0 | 0.3  | 0.0 | 0.2  | 0.0 |
| 73 | Vinyl chloride           | 0.8  | 0.0  | 1.2  | 0.2  | 0.4  | 0.0  | 0.4  | 0.0 | 0.4  | 0.0 | 0.6  | 0.3 |
| 74 | Bromomethane             | 5.3  | 0.3  | 4.7  | 0.4  | 4.0  | 0.2  | 3.9  | 0.0 | 4.2  | 0.0 | 4.0  | 0.1 |
| 75 | Freon-11                 | 3.7  | 0.1  | 3.5  | 0.1  | 2.8  | 0.1  | 3.0  | 0.2 | 3.1  | 0.1 | 2.7  | 0.7 |
| 76 | 1,1-Dichloroethene       | 2.6  | 0.3  | 2.9  | 0.7  | 2.5  | 0.2  | 2.4  | 0.0 | 2.4  | 0.0 | 2.4  | 0.0 |
| 77 | Methylene Chloride       | 0.8  | 0.2  | 1.0  | 0.8  | 0.4  | 0.6  | 0.2  | 0.3 | 1.7  | 0.0 | 0.2  | 0.2 |
| 78 | Freon-113                | 0.8  | 0.0  | 0.8  | 0.0  | 0.3  | 0.0  | 0.3  | 0.1 | 0.6  | 0.0 | 0.6  | 0.0 |
| 79 | trans-1,2-Dichloroethene | 0.9  | 0.4  | 1.3  | 0.2  | 0.6  | 0.0  | 0.6  | 0.0 | 0.6  | 0.0 | 0.6  | 0.0 |
| 80 | 1,1-Dichloroethane       | 0.0  | 0.1  | 0.0  | 0.1  | 0.0  | 0.0  | 0.0  | 0.0 | 0.1  | 0.1 | 0.2  | 0.3 |
| 81 | cis-1,2-Dichloroethene   | 51.3 | 2.4  | 88.7 | 46.0 | 50.3 | 3.8  | 4.1  | 0.5 | 8.2  | 1.4 | 9.5  | 0.9 |
| 82 | Chloroform               | 2.7  | 0.4  | 3.8  | 1.0  | 0.4  | 0.6  | 0.1  | 0.1 | 1.1  | 0.1 | 1.4  | 0.3 |

|    |                           |      |     |     |     |     |     |     |     |     |     |      |     |
|----|---------------------------|------|-----|-----|-----|-----|-----|-----|-----|-----|-----|------|-----|
| 83 | 1,2-Dichloroethane        | 0.1  | 0.0 | 0.1 | 0.0 | 0.1 | 0.0 | 0.1 | 0.0 | 0.1 | 0.0 | 0.1  | 0.0 |
| 84 | 1,1,1-Trichloroethane     | 0.0  | 0.0 | 0.0 | 0.0 | 0.4 | 0.6 | 0.0 | 0.0 | 0.0 | 0.0 | 0.0  | 0.0 |
| 85 | Carbon Tetrachloride      | 0.7  | 0.0 | 0.8 | 0.1 | 0.4 | 0.0 | 0.4 | 0.1 | 0.6 | 0.0 | 0.7  | 0.0 |
| 86 | 1,2-Dichloropropane       | 0.0  | 0.0 | 0.4 | 0.3 | 0.0 | 0.0 | 0.0 | 0.0 | 0.3 | 0.2 | 0.9  | 0.6 |
| 87 | Trichloroethene           | 0.0  | 0.0 | 0.0 | 0.0 | 0.0 | 0.0 | 0.0 | 0.0 | 0.0 | 0.0 | 0.0  | 0.0 |
| 88 | cis-1,3-Dichloropropene   | 1.9  | 0.3 | 3.2 | 1.4 | 0.4 | 0.6 | 0.5 | 0.7 | 0.1 | 0.2 | 0.8  | 0.8 |
| 89 | 1,1,2-Trichloroethane     | 0.0  | 0.0 | 0.0 | 0.0 | 0.0 | 0.0 | 0.0 | 0.0 | 0.0 | 0.0 | 0.0  | 0.0 |
| 90 | 1,1,2,2-Tetrachloroethane | 0.7  | 0.4 | 3.8 | 0.6 | 0.3 | 0.1 | 0.4 | 0.2 | 0.3 | 0.1 | 0.2  | 0.1 |
| 91 | Benzyl Chloride           | 5.1  | 0.0 | 4.9 | 0.0 | 4.9 | 0.1 | 4.8 | 0.0 | 6.9 | 0.7 | 13.1 | 8.1 |
| 92 | 1,3-Dichlorobenzene       | 2.2  | 0.1 | 1.8 | 0.1 | 1.4 | 0.0 | 1.5 | 0.2 | 1.3 | 0.0 | 1.4  | 0.0 |
| 93 | 1,4-Dichlorobenzene       | 8.1  | 0.3 | 7.2 | 0.3 | 3.1 | 0.2 | 3.0 | 0.2 | 7.7 | 1.6 | 38.8 | 4.7 |
| 94 | 1,2-Dichlorobenzene       | 2.9  | 0.0 | 2.7 | 0.0 | 2.6 | 0.0 | 2.6 | 0.0 | 2.6 | 0.0 | 3.4  | 1.1 |
| 95 | Acetylene                 | 10.4 | 0.4 | 7.2 | 1.8 | 4.1 | 3.9 | 6.9 | 2.6 | 0.1 | 0.1 | 3.2  | 4.6 |
| 96 | Carbon disulfide          | 1.7  | 0.0 | 2.0 | 0.9 | 0.4 | 0.0 | 0.7 | 0.6 | 0.0 | 0.0 | 0.0  | 0.0 |
| 97 | Tetrahydrofuran           | 0.4  | 0.5 | 1.5 | 0.2 | 0.0 | 0.0 | 0.0 | 0.0 | 0.5 | 0.2 | 1.1  | 0.2 |
| 98 | 1,4-Dioxane               | 2.9  | 0.0 | 2.9 | 0.1 | 2.6 | 0.0 | 2.6 | 0.0 | 2.8 | 0.0 | 3.0  | 0.2 |

| No. | Species            | Anthracite- CS |     | Honeycomb -CS |      | Anthracite- SG |      | Bitumite -SG |      | Firewood -SG |      | Branch-SG |      |
|-----|--------------------|----------------|-----|---------------|------|----------------|------|--------------|------|--------------|------|-----------|------|
|     |                    | Avg            | SD  | Avg           | SD   | Avg            | SD   | Avg          | SD   | Avg          | SD   | Avg       | SD   |
| 1   | Ethane             | 0.1            | 0.1 | 0.2           | 0.3  | 0.3            | 0.4  | 0.0          | 0.0  | 0.1          | 0.1  | 0.0       | 0.0  |
| 2   | Propane            | 5.7            | 1.4 | 5.2           | 2.8  | 14.9           | 11.9 | 46.7         | 1.6  | 87.1         | 42.1 | 38.3      | 12.8 |
| 3   | Isobutane          | 6.8            | 3.3 | 4.7           | 6.6  | 19.1           | 6.4  | 55.4         | 34.8 | 21.2         | 16.2 | 10.9      | 3.8  |
| 4   | n-Butane           | 30.1           | 8.0 | 28.7          | 19.7 | 30.5           | 16.6 | 81.4         | 52.3 | 43.1         | 9.3  | 15.5      | 4.7  |
| 5   | iso-Pentane        | 20.4           | 1.8 | 8.3           | 4.3  | 15.2           | 13.0 | 31.8         | 4.8  | 97.4         | 80.1 | 107       | 109  |
| 6   | n-Pentane          | 4.6            | 0.1 | 5.8           | 3.2  | 10.8           | 8.3  | 25.9         | 0.1  | 37.0         | 1.0  | 16.6      | 13.8 |
| 7   | 2,2-Dimethylbutane | 0.2            | 0.0 | 0.2           | 0.1  | 0.4            | 0.3  | 0.9          | 0.2  | 0.8          | 0.6  | 0.5       | 0.6  |
| 8   | Cyclopentane       | 0.0            | 0.0 | 0.0           | 0.0  | 0.0            | 0.0  | 2.0          | 2.9  | 1.3          | 1.8  | 3.9       | 5.3  |
| 9   | 2,3-Dimethylbutane | 1.9            | 1.9 | 0.8           | 0.7  | 2.7            | 0.3  | 7.1          | 7.1  | 14.2         | 9.4  | 13.7      | 2.2  |

|    |                        |      |      |      |      |       |      |       |      |       |      |      |      |
|----|------------------------|------|------|------|------|-------|------|-------|------|-------|------|------|------|
| 10 | 2-Methylpentane        | 4.1  | 1.3  | 3.6  | 2.5  | 7.0   | 5.7  | 14.8  | 3.4  | 21.0  | 2.1  | 20.8 | 10.4 |
| 11 | 3-Methylpentane        | 1.6  | 0.2  | 1.7  | 1.2  | 2.4   | 1.5  | 5.8   | 2.3  | 5.8   | 3.6  | 0.7  | 1.0  |
| 12 | n-Hexane               | 2.4  | 0.1  | 2.9  | 2.1  | 3.7   | 1.5  | 11.3  | 4.2  | 17.8  | 1.8  | 8.3  | 7.6  |
| 13 | Methylcyclopentane     | 1.1  | 0.2  | 1.3  | 0.6  | 1.4   | 0.5  | 3.8   | 2.1  | 4.3   | 2.1  | 1.8  | 1.5  |
| 14 | 2,4-Dimethylpentane    | 0.1  | 0.0  | 0.3  | 0.1  | 0.3   | 0.1  | 0.6   | 0.8  | 0.3   | 0.4  | 0.0  | 0.0  |
| 15 | Cyclohexane            | 0.6  | 0.1  | 0.3  | 0.2  | 1.2   | 0.9  | 2.7   | 0.4  | 0.4   | 0.5  | 0.7  | 0.8  |
| 16 | 2-Methylhexane         | 0.9  | 0.2  | 0.5  | 0.4  | 1.8   | 2.3  | 2.4   | 2.3  | 3.6   | 0.4  | 7.5  | 6.1  |
| 17 | 2,3-Dimethylpentane    | 0.3  | 0.2  | 0.4  | 0.1  | 0.5   | 0.3  | 0.9   | 1.2  | 3.4   | 4.5  | 0.1  | 0.1  |
| 18 | 3-Methylhexane         | 0.5  | 0.5  | 1.1  | 0.5  | 1.3   | 0.6  | 1.2   | 1.6  | 5.1   | 0.4  | 2.0  | 1.7  |
| 19 | 2,2,4-Trimethylpentane | 0.1  | 0.2  | 0.3  | 0.1  | 0.8   | 0.7  | 0.5   | 0.7  | 0.3   | 0.4  | 1.1  | 1.0  |
| 20 | n-Heptane              | 1.3  | 0.1  | 1.5  | 0.4  | 2.0   | 1.4  | 14.2  | 10.3 | 17.8  | 13.8 | 6.7  | 0.7  |
| 21 | Methylcyclohexane      | 0.5  | 0.1  | 0.8  | 0.3  | 1.3   | 0.7  | 3.2   | 0.7  | 3.4   | 0.2  | 1.8  | 1.4  |
| 22 | 2,3,4-Trimethylpentane | 0.1  | 0.1  | 0.1  | 0.1  | 0.2   | 0.2  | 0.2   | 0.3  | 0.2   | 0.3  | 0.1  | 0.1  |
| 23 | 2-Methylheptane        | 0.2  | 0.2  | 0.5  | 0.1  | 0.6   | 0.8  | 1.2   | 1.3  | 0.6   | 0.8  | 0.2  | 0.2  |
| 24 | 3-Methylheptane        | 0.0  | 0.0  | 0.1  | 0.1  | 0.4   | 0.2  | 0.5   | 0.6  | 1.4   | 0.3  | 0.0  | 0.0  |
| 25 | n-Octane               | 0.6  | 0.0  | 0.9  | 0.3  | 1.3   | 1.0  | 4.0   | 1.0  | 11.3  | 13.5 | 2.8  | 0.3  |
| 26 | n-Nonane               | 0.5  | 0.1  | 0.8  | 0.3  | 1.6   | 1.4  | 4.5   | 1.7  | 10.3  | 9.6  | 3.0  | 0.4  |
| 27 | n-Decane               | 0.8  | 0.1  | 1.5  | 0.4  | 3.1   | 2.3  | 9.6   | 0.9  | 15.9  | 1.7  | 7.3  | 4.5  |
| 28 | Undecane               | 3.4  | 4.3  | 8.5  | 4.0  | 15.5  | 0.0  | 54.6  | 39.3 | 23.7  | 2.1  | 35.5 | 30.6 |
| 29 | Dodecane               | 53.9 | 20.6 | 77.7 | 38.2 | 139.8 | 56.2 | 134.3 | 32.1 | 120.7 | 14.8 | 71.8 | 10.7 |
| 30 | Ethylene               | 1.0  | 0.4  | 0.7  | 0.0  | 0.9   | 0.4  | 0.7   | 0.0  | 1.6   | 0.8  | 0.3  | 0.5  |
| 31 | Propylene              | 1.4  | 0.2  | 0.6  | 0.9  | 4.0   | 4.8  | 27.7  | 20.2 | 123.9 | 4.6  | 34.3 | 23.6 |
| 32 | 1-Butene               | 2.6  | 0.7  | 2.9  | 0.9  | 5.0   | 0.7  | 20.7  | 13.4 | 18.2  | 7.0  | 11.1 | 3.5  |
| 33 | trans-2-Butene         | 1.2  | 0.4  | 0.8  | 0.4  | 2.3   | 2.4  | 4.4   | 0.7  | 5.7   | 1.2  | 3.2  | 1.6  |
| 34 | cis-2-Butene           | 0.9  | 0.2  | 0.7  | 0.4  | 1.8   | 1.9  | 3.3   | 0.7  | 5.7   | 1.1  | 3.3  | 1.7  |
| 35 | Isoprene               | 1.4  | 0.9  | 0.5  | 0.4  | 2.9   | 1.8  | 6.3   | 0.6  | 11.5  | 10.1 | 12.4 | 3.1  |
| 36 | 1-Pentene              | 1.1  | 0.4  | 0.9  | 0.4  | 1.6   | 1.1  | 8.6   | 5.3  | 16.7  | 16.8 | 2.6  | 2.0  |
| 37 | trans-2-Pentene        | 0.5  | 0.2  | 0.4  | 0.2  | 0.8   | 0.7  | 2.6   | 1.4  | 4.7   | 4.5  | 2.0  | 0.4  |
| 38 | cis-2-Pentene          | 0.3  | 0.1  | 0.2  | 0.1  | 0.5   | 0.4  | 1.6   | 0.7  | 2.4   | 3.3  | 1.2  | 0.4  |

|    |                         |      |     |      |     |      |      |      |      |      |      |      |      |
|----|-------------------------|------|-----|------|-----|------|------|------|------|------|------|------|------|
| 39 | 1-Hexene                | 1.3  | 0.5 | 0.7  | 0.4 | 1.8  | 1.1  | 7.1  | 1.0  | 16.3 | 22.6 | 6.8  | 1.7  |
| 40 | 1,3-Butadiene           | 1.1  | 0.5 | 0.4  | 0.1 | 3.9  | 0.2  | 0.8  | 0.0  | 26.8 | 9.2  | 8.3  | 10.7 |
| 41 | Benzene                 | 13.6 | 1.9 | 21.7 | 8.2 | 39.7 | 28.5 | 150  | 19.2 | 326  | 66.1 | 246  | 28.0 |
| 42 | Toluene                 | 9.8  | 1.2 | 13.4 | 4.6 | 32.2 | 25.0 | 104  | 13.6 | 215  | 26.1 | 75.9 | 14.2 |
| 43 | Ethylbenzene            | 2.3  | 0.6 | 4.4  | 1.3 | 8.3  | 6.9  | 24.0 | 0.0  | 33.0 | 9.9  | 21.1 | 4.2  |
| 44 | m-Xylene                | 7.4  | 1.7 | 15.3 | 4.2 | 15.2 | 4.1  | 6.9  | 1.6  | 179  | 34.2 | 54.2 | 20.0 |
| 45 | p-Xylene                | 3.4  | 0.9 | 7.5  | 2.1 | 19.3 | 9.4  | 7.5  | 5.2  | 86.2 | 24.4 | 28.9 | 8.1  |
| 46 | Styrene                 | 1.8  | 0.1 | 2.8  | 1.1 | 8.3  | 9.7  | 27.3 | 22.7 | 31.9 | 38.6 | 24.5 | 16.9 |
| 47 | o-Xylene                | 1.6  | 0.3 | 3.2  | 0.8 | 7.3  | 6.9  | 19.1 | 4.4  | 29.9 | 19.9 | 15.0 | 0.0  |
| 48 | Isopropylbenzene        | 0.1  | 0.0 | 0.2  | 0.1 | 0.4  | 0.3  | 1.1  | 0.2  | 1.6  | 0.8  | 0.4  | 0.6  |
| 49 | n-Propylbenzene         | 0.1  | 0.0 | 0.3  | 0.2 | 1.1  | 1.1  | 3.4  | 0.8  | 1.9  | 0.5  | 1.2  | 1.0  |
| 50 | m-Ethyltoluene          | 0.3  | 0.1 | 0.6  | 0.1 | 1.5  | 1.6  | 5.4  | 4.4  | 6.5  | 6.2  | 3.0  | 0.9  |
| 51 | p-Ethyltoluene          | 0.2  | 0.1 | 0.4  | 0.1 | 1.6  | 1.6  | 3.9  | 2.4  | 6.7  | 6.0  | 2.7  | 1.4  |
| 52 | 1,3,5-Trimethylbenzene  | 0.2  | 0.1 | 0.4  | 0.1 | 1.1  | 0.8  | 2.8  | 0.0  | 4.1  | 2.3  | 2.1  | 0.2  |
| 53 | o-Ethyltoluene          | 0.3  | 0.1 | 0.7  | 0.2 | 1.6  | 1.7  | 4.2  | 2.0  | 7.4  | 6.7  | 3.2  | 1.1  |
| 54 | 1,2,4-Trimethylbenzene  | 1.0  | 0.1 | 1.8  | 0.5 | 5.1  | 4.0  | 13.0 | 1.0  | 16.4 | 8.1  | 9.3  | 0.2  |
| 55 | 1,2,3-Trimethylbenzene  | 0.6  | 0.1 | 1.1  | 0.3 | 3.2  | 3.5  | 7.9  | 4.2  | 10.4 | 14.5 | 5.8  | 3.0  |
| 56 | m-Diethylbenzene        | 0.2  | 0.0 | 0.5  | 0.2 | 1.3  | 1.4  | 3.9  | 0.4  | 3.7  | 1.8  | 8.2  | 8.3  |
| 57 | p-Diethylbenzene        | 0.3  | 0.0 | 0.6  | 0.1 | 1.0  | 0.4  | 2.8  | 1.6  | 2.1  | 2.5  | 1.7  | 1.8  |
| 58 | 4-Ethyltoluene          | 2.1  | 0.1 | 2.8  | 0.4 | 5.2  | 4.1  | 2.7  | 0.9  | 22.3 | 10.3 | 7.9  | 3.9  |
| 59 | Naphthalene             | 2.1  | 0.3 | 4.3  | 1.1 | 16.4 | 19.4 | 5.1  | 4.0  | 7.0  | 8.5  | 9.2  | 11.1 |
| 60 | Acrolein                | 2.5  | 1.3 | 2.2  | 0.4 | 4.6  | 2.7  | 2.3  | 0.2  | 40.7 | 16.5 | 70.3 | 24.6 |
| 61 | Acetone                 | 8.1  | 3.4 | 7.3  | 1.6 | 38.6 | 4.6  | 11.9 | 6.9  | 130  | 29.9 | 153  | 38.9 |
| 62 | Methyl ethyl ketone     | 2.5  | 0.0 | 3.7  | 1.8 | 2.5  | 0.0  | 2.5  | 0.0  | 2.5  | 0.0  | 2.5  | 0.0  |
| 63 | Methyl Isobutyl Ketone  | 0.1  | 0.0 | 0.1  | 0.0 | 0.1  | 0.0  | 0.1  | 0.0  | 0.1  | 0.0  | 0.1  | 0.0  |
| 64 | Methyl butyl ketone     | 1.9  | 0.2 | 2.3  | 0.3 | 2.7  | 0.8  | 2.7  | 1.4  | 8.2  | 9.3  | 4.7  | 4.5  |
| 65 | Ethanol                 | 24.2 | 8.7 | 12.2 | 0.7 | 36.9 | 3.8  | 24.8 | 9.3  | 7.0  | 8.7  | 62.0 | 22.0 |
| 66 | Isopropyl Alcohol       | 1.1  | 0.0 | 1.1  | 0.0 | 1.1  | 0.0  | 1.1  | 0.0  | 1.1  | 0.0  | 1.1  | 0.0  |
| 67 | Methyl tert-butyl ether | 3.7  | 0.1 | 3.2  | 0.8 | 4.3  | 2.7  | 2.9  | 1.2  | 2.0  | 0.1  | 2.6  | 0.8  |



|    |                           |      |     |      |     |      |     |      |     |      |      |      |     |
|----|---------------------------|------|-----|------|-----|------|-----|------|-----|------|------|------|-----|
| 68 | Ethyl Acetate             | 1.1  | 0.7 | 0.3  | 0.0 | 3.0  | 3.4 | 1.7  | 1.3 | 1.7  | 1.0  | 0.9  | 0.4 |
| 69 | Methyl Methacrylate       | 0.0  | 0.0 | 0.0  | 0.0 | 0.1  | 0.2 | 0.0  | 0.0 | 2.0  | 2.8  | 0.8  | 1.2 |
| 70 | Freon-12                  | 0.0  | 0.0 | 0.0  | 0.0 | 0.0  | 0.0 | 0.0  | 0.0 | 0.0  | 0.0  | 0.0  | 0.0 |
| 71 | Chloromethane             | 0.0  | 0.0 | 0.0  | 0.0 | 0.1  | 0.2 | 0.0  | 0.0 | 0.0  | 0.1  | 0.5  | 0.7 |
| 72 | Freon-114                 | 0.3  | 0.0 | 0.3  | 0.1 | 0.5  | 0.1 | 0.5  | 0.2 | 0.4  | 0.1  | 0.3  | 0.0 |
| 73 | Vinyl chloride            | 0.4  | 0.0 | 0.4  | 0.1 | 0.5  | 0.1 | 0.4  | 0.0 | 0.5  | 0.1  | 0.5  | 0.1 |
| 74 | Bromomethane              | 4.1  | 0.2 | 3.9  | 0.1 | 4.1  | 0.3 | 3.9  | 0.0 | 4.2  | 0.4  | 4.3  | 0.6 |
| 75 | Freon-11                  | 3.6  | 0.2 | 4.2  | 0.8 | 7.0  | 2.3 | 5.1  | 1.4 | 4.2  | 0.6  | 4.1  | 0.3 |
| 76 | 1,1-Dichloroethene        | 2.4  | 0.0 | 2.4  | 0.0 | 2.4  | 0.0 | 2.4  | 0.0 | 2.4  | 0.0  | 2.4  | 0.0 |
| 77 | Methylene Chloride        | 1.0  | 0.1 | 0.2  | 0.1 | 3.9  | 1.9 | 0.3  | 0.2 | 2.9  | 3.4  | 1.6  | 1.9 |
| 78 | Freon-113                 | 0.8  | 0.1 | 0.9  | 0.2 | 2.2  | 1.1 | 1.5  | 0.9 | 1.2  | 0.6  | 1.1  | 0.3 |
| 79 | trans-1,2-Dichloroethene  | 0.6  | 0.0 | 0.6  | 0.0 | 0.6  | 0.0 | 0.6  | 0.0 | 0.7  | 0.1  | 0.6  | 0.0 |
| 80 | 1,1-Dichloroethane        | 1.1  | 1.0 | 0.8  | 0.6 | 1.4  | 0.9 | 0.6  | 0.0 | 0.4  | 0.1  | 0.4  | 0.4 |
| 81 | cis-1,2-Dichloroethene    | 15.7 | 0.3 | 8.5  | 0.6 | 24.2 | 9.8 | 11.7 | 3.9 | 99.0 | 36.1 | 13.6 | 7.0 |
| 82 | Chloroform                | 2.1  | 0.5 | 2.1  | 1.4 | 2.9  | 1.5 | 1.2  | 0.2 | 1.3  | 0.5  | 1.8  | 1.4 |
| 83 | 1,2-Dichloroethane        | 0.1  | 0.0 | 0.1  | 0.0 | 0.1  | 0.0 | 0.1  | 0.0 | 0.1  | 0.0  | 0.1  | 0.0 |
| 84 | 1,1,1-Trichloroethane     | 0.0  | 0.0 | 0.0  | 0.0 | 0.0  | 0.0 | 0.0  | 0.0 | 2.8  | 4.0  | 0.0  | 0.0 |
| 85 | Carbon Tetrachloride      | 0.9  | 0.1 | 1.0  | 0.4 | 1.9  | 0.8 | 1.4  | 0.8 | 0.8  | 0.1  | 0.9  | 0.1 |
| 86 | 1,2-Dichloropropane       | 1.3  | 0.9 | 2.6  | 1.2 | 6.1  | 0.2 | 2.9  | 1.5 | 1.5  | 1.2  | 1.7  | 1.5 |
| 87 | Trichloroethene           | 0.0  | 0.0 | 0.0  | 0.0 | 0.0  | 0.0 | 0.0  | 0.0 | 0.0  | 0.0  | 0.0  | 0.0 |
| 88 | cis-1,3-Dichloropropene   | 0.1  | 0.2 | 0.4  | 0.1 | 0.5  | 0.1 | 0.5  | 0.3 | 0.4  | 0.4  | 0.8  | 0.9 |
| 89 | 1,1,2-Trichloroethane     | 0.0  | 0.0 | 0.0  | 0.0 | 0.0  | 0.0 | 0.0  | 0.0 | 0.0  | 0.0  | 0.0  | 0.0 |
| 90 | 1,1,2,2-Tetrachloroethane | 0.2  | 0.0 | 0.2  | 0.0 | 0.9  | 0.9 | 0.6  | 0.5 | 1.2  | 1.4  | 0.7  | 0.6 |
| 91 | Benzyl Chloride           | 7.8  | 0.7 | 10.2 | 1.7 | 12.0 | 0.8 | 9.4  | 0.9 | 14.6 | 0.5  | 10.8 | 1.3 |
| 92 | 1,3-Dichlorobenzene       | 1.3  | 0.0 | 1.4  | 0.0 | 2.4  | 1.5 | 1.3  | 0.0 | 2.5  | 1.6  | 1.9  | 0.8 |
| 93 | 1,4-Dichlorobenzene       | 9.9  | 1.6 | 15.5 | 4.1 | 19.5 | 1.8 | 19.7 | 6.7 | 19.5 | 10.0 | 16.9 | 3.1 |
| 94 | 1,2-Dichlorobenzene       | 2.6  | 0.0 | 2.9  | 0.4 | 3.5  | 1.3 | 3.6  | 0.8 | 3.4  | 1.0  | 3.3  | 0.8 |
| 95 | Acetylene                 | 0.0  | 0.0 | 0.0  | 0.0 | 0.0  | 0.0 | 0.0  | 0.0 | 0.0  | 0.0  | 0.2  | 0.2 |
| 96 | Carbon disulfide          | 0.0  | 0.0 | 0.0  | 0.0 | 3.1  | 3.3 | 0.0  | 0.0 | 1.7  | 2.4  | 0.7  | 0.9 |

28  
29

|    |                 |     |     |     |     |     |     |     |     |     |     |     |     |
|----|-----------------|-----|-----|-----|-----|-----|-----|-----|-----|-----|-----|-----|-----|
| 97 | Tetrahydrofuran | 1.7 | 0.7 | 2.8 | 1.2 | 5.9 | 1.0 | 2.0 | 0.4 | 1.6 | 0.2 | 1.6 | 0.1 |
| 98 | 1,4-Dioxane     | 3.0 | 0.2 | 3.5 | 0.2 | 3.3 | 0.1 | 2.9 | 0.1 | 3.0 | 0.2 | 2.9 | 0.2 |

---

**Table S5** Profiles of VOCs measured in solid fuel burning in this study ( $\mu\text{g}\cdot\text{kg}^{-1}$ )

| No. | Species                | Wood heating |        |                     |        | Residue heating |       | Coal heating           |           |                     |          | Cooking             |         |
|-----|------------------------|--------------|--------|---------------------|--------|-----------------|-------|------------------------|-----------|---------------------|----------|---------------------|---------|
|     |                        | Heated Kang  |        | semi-gasifier stove |        | Heated Kang     |       | Traditional coal stove |           | semi-gasifier stove |          | Old fashioned stove |         |
|     |                        | Firewood     | Branch | Firewood            | Branch | Maize           | Wheat | Anthracite             | Honeycomb | Anthracite          | Bitumite | Branch              | Corncob |
| 1   | Ethane                 | 13.6         | 7.6    | 0.1                 | 0.0    | 13.7            | 40.4  | 0.0                    | 0.0       | 0.2                 | 0.0      | 2.5                 | 24.9    |
| 2   | Propane                | 167          | 102    | 107                 | 63.6   | 139             | 64.1  | 1.4                    | 0.7       | 10.0                | 39.0     | 17.2                | 24.3    |
| 3   | Isobutane              | 32.6         | 8.9    | 24.5                | 18.2   | 9.6             | 12.2  | 1.7                    | 0.6       | 14.6                | 52.8     | 16.4                | 6.1     |
| 4   | n-Butane               | 31.0         | 21.2   | 55.3                | 25.7   | 22.9            | 21.6  | 7.4                    | 3.7       | 22.0                | 77.8     | 42.0                | 27.2    |
| 5   | iso-Pentane            | 360          | 253    | 111                 | 178    | 344             | 137   | 5.0                    | 1.1       | 10.0                | 25.5     | 93.6                | 182     |
| 6   | n-Pentane              | 12.1         | 12.5   | 49.1                | 27.6   | 8.4             | 0.3   | 1.1                    | 0.8       | 7.4                 | 21.5     | 8.4                 | 5.7     |
| 7   | 2,2-Dimethylbutane     | 0.1          | 0.1    | 1.2                 | 0.8    | 0.0             | 0.0   | 0.0                    | 0.0       | 0.3                 | 0.7      | 0.4                 | 0.2     |
| 8   | Cyclopentane           | 5.5          | 3.4    | 2.1                 | 6.5    | 4.4             | 1.6   | 0.0                    | 0.0       | 0.0                 | 2.2      | 0.0                 | 0.0     |
| 9   | 2,3-Dimethylbutane     | 17.6         | 16.6   | 21.2                | 22.7   | 21.3            | 6.1   | 0.5                    | 0.1       | 2.3                 | 4.5      | 26.3                | 12.9    |
| 10  | 2-Methylpentane        | 17.1         | 40.8   | 28.5                | 34.5   | 14.4            | 18.4  | 1.0                    | 0.5       | 4.7                 | 13.0     | 28.0                | 32.2    |
| 11  | 3-Methylpentane        | 0.9          | 0.9    | 8.6                 | 1.2    | 0.4             | 0.3   | 0.4                    | 0.2       | 1.7                 | 5.2      | 3.2                 | 2.3     |
| 12  | n-Hexane               | 5.1          | 5.9    | 23.3                | 13.8   | 9.3             | 1.4   | 0.6                    | 0.4       | 2.8                 | 10.2     | 4.6                 | 5.5     |
| 13  | Methylcyclopentane     | 1.2          | 1.5    | 6.2                 | 3.0    | 0.7             | 0.3   | 0.3                    | 0.2       | 1.0                 | 3.5      | 2.2                 | 2.8     |
| 14  | 2,4-Dimethylpentane    | 0.2          | 0.1    | 0.3                 | 0.0    | 0.8             | 0.2   | 0.0                    | 0.0       | 0.2                 | 0.7      | 0.4                 | 0.7     |
| 15  | Cyclohexane            | 1.3          | 1.1    | 0.5                 | 1.1    | 0.7             | 0.8   | 0.1                    | 0.0       | 0.8                 | 2.3      | 0.8                 | 2.8     |
| 16  | 2-Methylhexane         | 11.4         | 16.4   | 4.7                 | 12.4   | 1.2             | 30.4  | 0.2                    | 0.1       | 1.0                 | 2.4      | 4.3                 | 30.0    |
| 17  | 2,3-Dimethylpentane    | 0.6          | 0.7    | 3.5                 | 0.2    | 0.7             | 0.2   | 0.1                    | 0.0       | 0.4                 | 0.5      | 0.6                 | 0.3     |
| 18  | 3-Methylhexane         | 1.8          | 1.3    | 6.8                 | 3.4    | 1.1             | 1.2   | 0.1                    | 0.1       | 1.0                 | 0.7      | 1.1                 | 3.5     |
| 19  | 2,2,4-Trimethylpentane | 0.1          | 0.1    | 0.3                 | 1.8    | 1.3             | 0.0   | 0.0                    | 0.0       | 0.6                 | 0.3      | 0.5                 | 0.9     |
| 20  | n-Heptane              | 6.2          | 6.8    | 20.5                | 11.1   | 6.5             | 22.0  | 0.3                    | 0.2       | 1.4                 | 9.8      | 3.6                 | 9.4     |
| 21  | Methylcyclohexane      | 0.6          | 0.9    | 4.5                 | 3.0    | 0.2             | 0.8   | 0.1                    | 0.1       | 0.9                 | 2.8      | 0.6                 | 0.8     |
| 22  | 2,3,4-Trimethylpentane | 0.2          | 0.2    | 0.2                 | 0.2    | 0.3             | 0.2   | 0.0                    | 0.0       | 0.2                 | 0.1      | 0.1                 | 0.5     |
| 23  | 2-Methylheptane        | 0.3          | 0.2    | 0.6                 | 0.3    | 1.4             | 0.9   | 0.1                    | 0.1       | 0.3                 | 1.2      | 0.5                 | 2.8     |
| 24  | 3-Methylheptane        | 0.1          | 0.2    | 1.8                 | 0.0    | 0.1             | 0.2   | 0.0                    | 0.0       | 0.3                 | 0.3      | 0.4                 | 0.7     |
| 25  | n-Octane               | 3.4          | 3.6    | 11.9                | 4.6    | 9.9             | 5.9   | 0.2                    | 0.1       | 0.8                 | 3.1      | 1.6                 | 7.1     |
| 26  | n-Nonane               | 3.1          | 2.7    | 11.5                | 4.9    | 4.9             | 7.9   | 0.1                    | 0.1       | 1.1                 | 3.4      | 1.3                 | 5.6     |

|    |                        |      |      |       |      |      |      |      |      |      |      |      |      |
|----|------------------------|------|------|-------|------|------|------|------|------|------|------|------|------|
| 27 | n-Decane               | 3.4  | 2.3  | 20.8  | 12.2 | 1.6  | 11.9 | 0.2  | 0.2  | 2.1  | 8.1  | 2.0  | 7.4  |
| 28 | Undecane               | 4.6  | 2.3  | 32.1  | 59.0 | 3.5  | 2.1  | 0.8  | 1.1  | 12.8 | 53.0 | 6.0  | 39.2 |
| 29 | Dodecane               | 11.2 | 5.3  | 157   | 119  | 15.0 | 20.3 | 13.3 | 10.1 | 127  | 105  | 63.5 | 374  |
| 30 | Ethylene               | 3.3  | 0.0  | 2.3   | 0.5  | 4.3  | 2.3  | 0.3  | 0.1  | 0.7  | 0.6  | 2.2  | 1.0  |
| 31 | Propylene              | 295  | 192  | 164.2 | 57.0 | 276  | 16.9 | 0.3  | 0.1  | 2.4  | 19.0 | 15.8 | 63.8 |
| 32 | 1-Butene               | 47.4 | 34.1 | 22.7  | 18.5 | 44.7 | 3.5  | 0.6  | 0.4  | 4.0  | 19.8 | 14.3 | 15.7 |
| 33 | trans-2-Butene         | 25.6 | 14.1 | 7.3   | 5.3  | 12.9 | 1.0  | 0.3  | 0.1  | 1.4  | 3.5  | 4.2  | 9.5  |
| 34 | cis-2-Butene           | 20.4 | 11.4 | 7.4   | 5.4  | 9.4  | 0.7  | 0.2  | 0.1  | 1.2  | 2.9  | 3.3  | 8.2  |
| 35 | Isoprene               | 19.6 | 20.1 | 13.0  | 20.7 | 14.8 | 0.5  | 0.3  | 0.1  | 2.1  | 5.1  | 6.8  | 12.1 |
| 36 | 1-Pentene              | 13.5 | 15.2 | 18.4  | 4.4  | 5.0  | 1.1  | 0.3  | 0.1  | 1.1  | 6.1  | 2.7  | 13.2 |
| 37 | trans-2-Pentene        | 13.8 | 11.0 | 5.2   | 3.3  | 8.2  | 0.5  | 0.1  | 0.0  | 0.5  | 1.9  | 2.1  | 7.5  |
| 38 | cis-2-Pentene          | 7.5  | 6.6  | 2.4   | 2.0  | 4.8  | 0.3  | 0.1  | 0.0  | 0.3  | 1.2  | 1.2  | 5.5  |
| 39 | 1-Hexene               | 11.7 | 17.5 | 16.5  | 11.3 | 25.6 | 2.9  | 0.3  | 0.1  | 1.3  | 5.7  | 6.2  | 9.4  |
| 40 | 1,3-Butadiene          | 58.1 | 44.2 | 33.7  | 23.9 | 29.2 | 66.2 | 0.3  | 0.1  | 3.2  | 0.7  | 13.3 | 90.4 |
| 41 | Benzene                | 166  | 193  | 419   | 409  | 141  | 71.1 | 3.4  | 2.8  | 27.3 | 121  | 120  | 464  |
| 42 | Toluene                | 105  | 109  | 280   | 126  | 104  | 86.5 | 2.4  | 1.7  | 21.8 | 83.7 | 45.3 | 143  |
| 43 | Ethylbenzene           | 17.5 | 19.1 | 41.8  | 35.0 | 12.5 | 22.3 | 0.6  | 0.6  | 5.6  | 19.9 | 9.5  | 43.9 |
| 44 | m-Xylene               | 16.7 | 13.9 | 63.0  | 29.5 | 10.9 | 23.7 | 0.5  | 0.5  | 5.3  | 19.1 | 7.1  | 29.2 |
| 45 | p-Xylene               | 16.7 | 13.9 | 63.0  | 29.5 | 11.5 | 23.7 | 0.5  | 0.5  | 5.3  | 19.1 | 7.1  | 29.2 |
| 46 | Styrene                | 23.4 | 25.3 | 33.7  | 40.7 | 9.4  | 36.4 | 0.5  | 0.4  | 5.0  | 18.2 | 12.9 | 61.6 |
| 47 | o-Xylene               | 12.5 | 10.1 | 35.3  | 24.8 | 8.5  | 19.6 | 0.4  | 0.4  | 4.7  | 15.0 | 5.8  | 23.5 |
| 48 | Isopropylbenzene       | 0.8  | 0.8  | 1.9   | 0.7  | 0.4  | 0.8  | 0.0  | 0.0  | 0.2  | 0.8  | 0.4  | 2.0  |
| 49 | n-Propylbenzene        | 1.8  | 1.4  | 2.6   | 2.0  | 0.2  | 1.0  | 0.0  | 0.0  | 0.7  | 2.7  | 0.5  | 1.0  |
| 50 | m-Ethyltoluene         | 3.3  | 1.4  | 7.2   | 4.9  | 0.9  | 4.7  | 0.1  | 0.1  | 1.0  | 3.6  | 0.7  | 3.5  |
| 51 | p-Ethyltoluene         | 3.0  | 1.4  | 7.6   | 4.5  | 0.6  | 2.6  | 0.0  | 0.0  | 1.0  | 2.8  | 0.8  | 2.0  |
| 52 | 1,3,5-Trimethylbenzene | 2.0  | 1.2  | 4.9   | 3.4  | 0.8  | 3.3  | 0.1  | 0.1  | 0.8  | 2.3  | 0.7  | 2.3  |
| 53 | o-Ethyltoluene         | 2.3  | 1.4  | 8.3   | 5.4  | 1.0  | 5.5  | 0.1  | 0.1  | 1.0  | 3.1  | 1.1  | 3.7  |
| 54 | 1,2,4-Trimethylbenzene | 5.0  | 2.6  | 20.0  | 15.4 | 2.5  | 12.9 | 0.2  | 0.2  | 3.4  | 10.6 | 2.7  | 9.3  |
| 55 | 1,2,3-Trimethylbenzene | 1.4  | 0.7  | 10.5  | 9.6  | 0.8  | 2.9  | 0.2  | 0.1  | 2.0  | 5.7  | 1.6  | 5.2  |
| 56 | m-Diethylbenzene       | 0.4  | 0.3  | 4.5   | 13.6 | 0.2  | 1.3  | 0.1  | 0.1  | 0.8  | 3.1  | 2.2  | 1.9  |

|    |                          |      |      |       |       |      |      |     |     |      |      |      |      |
|----|--------------------------|------|------|-------|-------|------|------|-----|-----|------|------|------|------|
| 57 | p-Diethylbenzene         | 0.0  | 0.1  | 3.3   | 2.8   | 0.3  | 0.9  | 0.1 | 0.1 | 0.7  | 2.6  | 0.8  | 2.8  |
| 58 | 4-Ethyltoluene           | 6.6  | 4.2  | 27.3  | 13.1  | 3.4  | 12.9 | 0.5 | 0.4 | 3.6  | 2.1  | 7.1  | 13.5 |
| 59 | Naphthalene              | 19.2 | 10.5 | 107.7 | 145.6 | 7.5  | 23.3 | 2.9 | 3.1 | 90.7 | 47.0 | 38.1 | 276  |
| 60 | Acrolein                 | 171  | 110  | 50.5  | 117   | 95.9 | 93.8 | 0.6 | 0.3 | 3.3  | 1.9  | 47.1 | 227  |
| 61 | Acetone                  | 352  | 247  | 167   | 254   | 385  | 249  | 2.0 | 0.9 | 32.9 | 8.5  | 95.7 | 235  |
| 62 | Methyl ethyl ketone      | 180  | 152  | 32.0  | 78.6  | 194  | 152  | 2.8 | 1.4 | 9.1  | 6.3  | 45.1 | 158  |
| 63 | Methyl Isobutyl Ketone   | 1.2  | 1.4  | 0.5   | 0.3   | 0.0  | 4.3  | 0.1 | 0.0 | 0.4  | 0.3  | 0.8  | 2.9  |
| 64 | Methyl butyl ketone      | 8.3  | 5.9  | 8.8   | 2.6   | 4.3  | 26.2 | 0.5 | 0.3 | 2.1  | 2.0  | 7.3  | 16.0 |
| 65 | Ethanol                  | 0.0  | 0.0  | 7.3   | 103.0 | 18.6 | 91.7 | 6.0 | 1.6 | 29.8 | 18.8 | 57.4 | 28.8 |
| 66 | Isopropyl Alcohol        | 0.7  | 0.5  | 1.5   | 1.9   | 1.7  | 7.2  | 0.3 | 0.1 | 0.9  | 0.9  | 3.9  | 3.9  |
| 67 | Methyl tert-butyl ether  | 1.6  | 1.1  | 2.8   | 4.4   | 2.6  | 10.8 | 0.9 | 0.4 | 3.1  | 2.2  | 9.7  | 8.6  |
| 68 | Ethyl Acetate            | 3.0  | 2.5  | 6.4   | 9.1   | 3.9  | 15.1 | 1.7 | 1.1 | 6.4  | 4.5  | 15.4 | 18.4 |
| 69 | Methyl Methacrylate      | 2.2  | 2.1  | 0.0   | 0.0   | 0.0  | 0.0  | 0.0 | 0.0 | 0.0  | 0.0  | 0.0  | 4.4  |
| 70 | Freon-12                 | 1.4  | 0.8  | 0.0   | 0.0   | 0.3  | 3.1  | 0.0 | 0.0 | 0.0  | 0.0  | 0.0  | 0.0  |
| 71 | Chloromethane            | 6.6  | 9.8  | 8.5   | 11.0  | 43.9 | 99.7 | 0.0 | 0.0 | 0.0  | 0.0  | 35.2 | 36.6 |
| 72 | Freon-114                | 0.2  | 0.1  | 0.5   | 0.6   | 0.3  | 1.3  | 0.1 | 0.0 | 0.4  | 0.3  | 0.9  | 0.8  |
| 73 | Vinyl chloride           | 0.5  | 0.6  | 0.7   | 0.9   | 0.7  | 2.8  | 0.1 | 0.1 | 0.4  | 0.4  | 1.5  | 2.0  |
| 74 | Bromomethane             | 3.5  | 2.3  | 5.5   | 7.2   | 6.2  | 25.3 | 1.0 | 0.5 | 3.4  | 3.2  | 14.8 | 14.0 |
| 75 | Freon-11                 | 2.4  | 1.7  | 5.4   | 6.7   | 4.3  | 18.9 | 0.9 | 0.6 | 5.3  | 3.9  | 10.8 | 9.5  |
| 76 | 1,1-Dichloroethene       | 1.7  | 1.3  | 3.2   | 4.0   | 3.9  | 15.5 | 0.6 | 0.3 | 2.0  | 2.0  | 8.4  | 8.4  |
| 77 | Methylene Chloride       | 1.1  | 0.9  | 3.7   | 2.4   | 0.6  | 4.0  | 0.0 | 0.0 | 1.9  | 0.0  | 0.0  | 0.0  |
| 78 | Freon-113                | 0.5  | 0.4  | 1.5   | 1.7   | 0.4  | 1.9  | 0.2 | 0.1 | 1.6  | 1.1  | 1.9  | 2.0  |
| 79 | trans-1,2-Dichloroethene | 0.6  | 0.6  | 0.8   | 0.9   | 0.9  | 3.6  | 0.1 | 0.1 | 0.5  | 0.5  | 2.0  | 2.0  |
| 80 | 1,1-Dichloroethane       | 0.0  | 0.0  | 0.6   | 0.6   | 0.0  | 0.0  | 0.3 | 0.1 | 1.0  | 0.5  | 0.0  | 0.0  |
| 81 | cis-1,2-Dichloroethene   | 2.8  | 2.2  | 3.3   | 4.1   | 4.5  | 16.0 | 0.6 | 0.5 | 2.1  | 2.1  | 8.7  | 8.7  |
| 82 | Chloroform               | 1.8  | 1.7  | 1.6   | 2.9   | 0.7  | 0.6  | 0.5 | 0.3 | 2.1  | 0.9  | 3.9  | 4.8  |
| 83 | 1,2-Dichloroethane       | 0.3  | 0.7  | 2.1   | 2.6   | 0.0  | 0.0  | 0.4 | 0.4 | 4.7  | 1.6  | 1.8  | 3.8  |
| 84 | 1,1,1-Trichloroethane    | 0.1  | 0.0  | 0.1   | 0.2   | 0.1  | 0.6  | 0.0 | 0.0 | 0.1  | 0.1  | 0.3  | 0.3  |
| 85 | Carbon Tetrachloride     | 0.5  | 0.4  | 1.0   | 1.6   | 0.6  | 2.2  | 0.2 | 0.1 | 1.4  | 1.0  | 2.2  | 2.4  |
| 86 | 1,2-Dichloropropane      | 0.0  | 0.0  | 1.8   | 2.9   | 0.0  | 0.0  | 0.3 | 0.3 | 5.1  | 2.1  | 1.2  | 3.1  |

|    |                           |      |      |      |      |     |      |     |     |      |      |      |       |
|----|---------------------------|------|------|------|------|-----|------|-----|-----|------|------|------|-------|
| 87 | Trichloroethene           | 1.9  | 1.4  | 4.0  | 4.9  | 4.1 | 17.1 | 0.7 | 0.4 | 2.7  | 2.4  | 9.7  | 10.5  |
| 88 | cis-1,3-Dichloropropene   | 0.0  | 0.0  | 0.1  | 0.1  | 0.1 | 0.4  | 0.0 | 0.0 | 0.1  | 0.1  | 0.2  | 0.2   |
| 89 | 1,1,2-Trichloroethane     | 8.3  | 5.9  | 8.8  | 7.9  | 4.3 | 26.2 | 0.5 | 0.3 | 2.1  | 2.0  | 7.3  | 16.0  |
| 90 | 1,1,2,2-Tetrachloroethane | 0.5  | 1.9  | 1.3  | 1.1  | 0.5 | 2.5  | 0.1 | 0.0 | 0.6  | 0.4  | 1.0  | 0.9   |
| 91 | Benzyl Chloride           | 0.3  | 0.2  | 0.5  | 0.5  | 0.5 | 2.1  | 0.0 | 0.0 | 0.0  | 0.0  | 1.0  | 1.0   |
| 92 | 1,3-Dichlorobenzene       | 3.3  | 2.4  | 19.3 | 18.0 | 7.5 | 31.3 | 1.9 | 1.3 | 9.8  | 7.9  | 24.2 | 45.9  |
| 93 | 1,4-Dichlorobenzene       | 5.3  | 3.5  | 23.7 | 28.1 | 4.8 | 19.5 | 2.5 | 2.0 | 15.9 | 15.0 | 27.1 | 136.4 |
| 94 | 1,2-Dichlorobenzene       | 1.9  | 1.3  | 4.3  | 5.4  | 4.0 | 16.9 | 0.7 | 0.4 | 2.7  | 2.8  | 9.2  | 11.9  |
| 95 | Acetylene                 | 6.8  | 3.3  | 0.0  | 0.3  | 5.8 | 48.6 | 0.0 | 0.0 | 0.0  | 0.0  | 0.4  | 11.4  |
| 96 | Carbon disulfide          | 0.5  | 0.4  | 3.0  | 2.7  | 0.7 | 1.6  | 0.2 | 0.0 | 3.6  | 0.3  | 6.1  | 1.1   |
| 97 | Tetrahydrofuran           | 21.4 | 12.1 | 2.5  | 1.5  | 8.3 | 1.8  | 0.3 | 0.0 | 3.2  | 1.7  | 2.7  | 4.9   |
| 98 | 1,4-Dioxane               | 0.5  | 0.4  | 1.3  | 1.3  | 0.9 | 3.9  | 0.1 | 0.1 | 10.6 | 0.8  | 2.1  | 2.6   |

31

32

33

34 **Table S6** Coefficient of divergence among VOCs profiles emitted from solid fuel burning\*

|                | Firewood<br>-HK | Branch<br>-HK | Firewood<br>-SG | Branch<br>-SG | Corn straw<br>-HK | Wheat<br>straw-HK | Anthracite<br>-CS | Honeycomb<br>-CS | Anthracite<br>-SG | Bitumite<br>-SG | Branch -<br>-TS | Corn hub<br>-TS |
|----------------|-----------------|---------------|-----------------|---------------|-------------------|-------------------|-------------------|------------------|-------------------|-----------------|-----------------|-----------------|
| Firewood-HK    | 0               |               |                 |               |                   |                   |                   |                  |                   |                 |                 |                 |
| Branch-HK      | 0.23            | 0             |                 |               |                   |                   |                   |                  |                   |                 |                 |                 |
| Firewood-SG    | 0.55            | 0.58          | 0               |               |                   |                   |                   |                  |                   |                 |                 |                 |
| Branch-SG      | 0.53            | 0.55          | 0.35            | 0             |                   |                   |                   |                  |                   |                 |                 |                 |
| Corn straw-HK  | 0.70            | 0.66          | 0.78            | 0.76          | 0                 |                   |                   |                  |                   |                 |                 |                 |
| Wheat straw-HK | 0.71            | 0.68          | 0.81            | 0.80          | 0.52              | 0                 |                   |                  |                   |                 |                 |                 |
| Anthracite-CS  | 0.81            | 0.79          | 0.86            | 0.86          | 0.61              | 0.61              | 0                 |                  |                   |                 |                 |                 |
| Honeycomb-CS   | 0.85            | 0.83          | 0.90            | 0.90          | 0.66              | 0.65              | 0.32              | 0                |                   |                 |                 |                 |
| Anthracite-SG  | 0.63            | 0.63          | 0.61            | 0.58          | 0.67              | 0.67              | 0.72              | 0.80             | 0                 |                 |                 |                 |
| Bitumite-SG    | 0.57            | 0.59          | 0.47            | 0.46          | 0.72              | 0.75              | 0.77              | 0.84             | 0.46              | 0               |                 |                 |
| Branch-TS      | 0.57            | 0.57          | 0.53            | 0.48          | 0.71              | 0.75              | 0.84              | 0.88             | 0.47              | 0.52            | 0               |                 |
| Corn hub-TS    | 0.54            | 0.57          | 0.49            | 0.44          | 0.81              | 0.84              | 0.89              | 0.92             | 0.63              | 0.56            | 0.45            | 0               |

35

36

$$CD_{jk} = \sqrt{\frac{1}{p} \sum_{i=1}^p \left( \frac{x_{ij} - x_{ik}}{x_{ij} + x_{ik}} \right)^2}$$

37 where,  $x_{ij}$  represents the average concentration for a chemical component  $i$  at site  $j$ ,  $j$  and  $k$  represent two samples, and  $p$  is the number of  
 38 chemical components  
 39  
 40

41 **Table S7** Proximate Analysis results of solid fuel used in this study

| Fuel type              | Moisture, % | Ash, % | Volatile Matters,<br>VM% | Fixed<br>Carbon, % | Calorific<br>value, MJ·kg <sup>-1</sup> |
|------------------------|-------------|--------|--------------------------|--------------------|-----------------------------------------|
| Firewood               | 4.39        | 2.15   | 82.96                    | 10.51              | 19.03                                   |
| Branch                 | 4.37        | 2.72   | 79.66                    | 13.25              | 17.92                                   |
| Wheat straw            | 4.39        | 8.90   | 67.36                    | 19.32              | 18.52                                   |
| Maize straw            | 6.10        | 4.70   | 76.00                    | 13.20              | 17.73                                   |
| Corn cob               | 4.87        | 5.93   | 71.95                    | 17.25              | 17.72                                   |
| Anthracite             | 0.88        | 9.72   | 6.12                     | 83.28              | 29.68                                   |
| Honeycomb<br>briquette | 3.00        | 32.34  | 4.99                     | 59.67              | 20.37                                   |
| Bitumite               | 7.98        | 7.98   | 33.20                    | 50.84              | 22.02                                   |

42 \*Proximate Analysis Was Conducted by the Analytical Center of Chinese Academy of Guangzhou Institute of Energy Conversion

43



44 **Table S8** Parameters in evaluation of O<sub>3</sub> contribution from solid fuel burning in Guanzhong Plain

| Box model – Atmospheric capacity parameters |                                      |                              |                               | Emission rate of OFP    |                                          |                   |                                          |
|---------------------------------------------|--------------------------------------|------------------------------|-------------------------------|-------------------------|------------------------------------------|-------------------|------------------------------------------|
| Dimensions                                  | 300km in length <sup>a</sup>         | 100 km in width <sup>a</sup> | 516.2m in height <sup>b</sup> | Biomass fuels consumed  | 1.59E9 kg <sup>f</sup>                   | Coal used         | 2.50E9 kg <sup>f</sup>                   |
| Atmospheric volume of Guanzhong Plain       | 1.55E13 m <sup>3</sup> <sup>c</sup>  |                              |                               | EFs of OFP              | 4.51 g·kg <sup>-1</sup> <sup>g</sup>     | EFs of OFP        | 0.62 g·kg <sup>-1</sup> <sup>h</sup>     |
|                                             |                                      |                              |                               | Heating periods         | 100 days <sup>i</sup>                    |                   |                                          |
| O <sub>3</sub> concentration                | 28.8 µg·m <sup>-3</sup> <sup>d</sup> |                              |                               | OFP emission rate       | 7.17E4 kg·day <sup>-1</sup> <sup>j</sup> | OFP emission rate | 1.55E4 kg·day <sup>-1</sup> <sup>j</sup> |
| O <sub>3</sub> atmospheric capacity         | 4.46E5 kg <sup>e</sup>               |                              |                               | Total OFP emission rate | 8.72E4 kg·day <sup>-1</sup> <sup>k</sup> |                   |                                          |

45 a Sun, Shen et al. (2017)

46 b [http://apps.ecmwf.int/datasets/data/interim-full-daily/levtype=sfc/ boundary layer](http://apps.ecmwf.int/datasets/data/interim-full-daily/levtype=sfc/boundary%20layer)

47 c Expressed as volume = length \* width \* height

48 d <http://www.zhb.gov.cn/hjzl/dqhj/cskqzlzkyb/>, average O<sub>3</sub> concentration in winter of 2013

49 e Expressed as Atmospheric capacity = [O<sub>3</sub>] \* Atmospheric volume

50 f Shaanxi Province Statistical Yearbook 2013

51 g Average OFP value of biomass fuels heating burning in this study

52 h Account as bitumite only, use OFP of bitumite-SG in this study

53 i Sun, Shen et al. (2017)

54 j Expressed as OFP emission rate = Total fuels consumed \* EFs of OFP / Heating period (unit: kg·day<sup>-1</sup>)

55 k Expressed as Total OFP emission rate = OFP emission rate (biomass) + OFP emission rate (coal)

56

57 **Table S9** Parameters in evaluation of SOA contribution from solid fuel burning in Guanzhong Plain

| Box model – Atmospheric capacity parameters |                                       |                              |                               | Emission rate of SOAP    |                                        |                    |                                        |
|---------------------------------------------|---------------------------------------|------------------------------|-------------------------------|--------------------------|----------------------------------------|--------------------|----------------------------------------|
| Dimensions                                  | 300km in length <sup>a</sup>          | 100 km in width <sup>a</sup> | 516.2m in height <sup>b</sup> | Biomass fuels consumed   | 1.59E9 kg <sup>g</sup>                 | Coal used          | 2.50E9 kg <sup>g</sup>                 |
| Atmospheric volume of Guanzhong Plain       | 1.55E13 m <sup>3</sup> <sup>c</sup>   |                              |                               | EFs of SOAP              | 24.33 mg·kg <sup>-1</sup> <sup>h</sup> | EFs of SOAP        | 16.40 mg·kg <sup>-1</sup> <sup>i</sup> |
|                                             |                                       |                              |                               | Heating periods          | 100 days <sup>j</sup>                  |                    |                                        |
| PM <sub>2.5</sub> concentration             | 142.6 µg·m <sup>-3</sup> <sup>d</sup> | SOA fraction                 | 15.5% <sup>e</sup>            | SOAP emission rate       | 387 kg·day <sup>-1</sup> <sup>k</sup>  | SOAP emission rate | 410kg·day <sup>-1</sup> <sup>k</sup>   |
| SOA atmospheric capacity                    | 3.42E5 kg <sup>f</sup>                |                              |                               | Total SOAP emission rate | 797 kg·day <sup>-1</sup> <sup>m</sup>  |                    |                                        |

58 a Sun et al., 2017

59 b <http://apps.ecmwf.int/datasets/data/interim-full-daily/levtype=sfc/> boundary layer

60 c Expressed as volume = length \* width \* height

61 d <http://www.zhb.gov.cn/hjzl/dqhj/cskqzlkzyb/>, average O<sub>3</sub> concentration in winter of 2013

62 e Huang et al. (2014)

63 f Expressed as Atmospheric capacity = [PM<sub>2.5</sub>] \* Atmospheric volume

64 g Shaanxi Province Statistical Yearbook 2013

65 h Average SOAP value of biomass fuels heating burning in this study

66 i Account as bitumite only, use SOAP of bitumite-SG in this study

67 j Sun et al., 2017

68 k Expressed as SOAP emission rate = Total fuels consumed \* EFs of SOAP / Heating period (unit: kg·day<sup>-1</sup>)

69 m Expressed as Total SOAP emission rate = SOAP emission rate (biomass) + SOAP emission rate (coal)

70
