# Supplementary material for: VOCs emission profiles from rural cooking and heatingin Guanzhong Plain, China and its potential effect onregional O&lt;sub&gt;3&lt;/sub&gt; and SOA formation
Source: Copernicus journal article supplement (doi:10.5194/acp-2018-36), 2018-03-07
Supplement: Supplementary file [file Supporting information 3-Uncertainties.pdf › Supporting information 3-Uncertainties.pdf]

| Species                | >MDL=1, Firewood<br><MDL=0 -HK |        | >MDL=1, Branch –<br><MDL=0 HK |        | >MDL=1, Corn straw-<br><MDL=0 HK |         |
|------------------------|--------------------------------|--------|-------------------------------|--------|----------------------------------|---------|
| Ethane                 | 1                              | 18.3%  | 1                             | 10.4%  | 1                                | 25.0%   |
| Propane                | 1                              | 22.5%  | 1                             | 50.8%  | 1                                | 2.4%    |
| Isobutane              | 1                              | 24.3%  | 1                             | 64.0%  | 1                                | 38.9%   |
| n-Butane               | 1                              | 23.0%  | 1                             | 58.9%  | 1                                | 40.2%   |
| iso-Pentane            | 1                              | 17.6%  | 1                             | 43.7%  | 1                                | 16.4%   |
| n-Pentane              | 1                              | 12.2%  | 1                             | 53.9%  | 1                                | 2.6%    |
| 2,2-Dimethylbutane     | 1                              | 14.3%  | 1                             | 24.8%  | 0                                | 1593.4% |
| Cyclopentane           | 1                              | 18.5%  | 1                             | 17.5%  | 0                                | 1.2%    |
| 2,3-Dimethylbutane     | 1                              | 2.1%   | 1                             | 38.3%  | 1                                | 21.5%   |
| 2-Methylpentane        | 1                              | 152.7% | 1                             | 7.5%   | 1                                | 23.8%   |
| 3-Methylpentane        | 1                              | 21.8%  | 1                             | 30.4%  | 1                                | 22.7%   |
| n-Hexane               | 1                              | 3.5%   | 1                             | 50.4%  | 1                                | 24.2%   |
| Methylcyclopentane     | 1                              | 14.3%  | 1                             | 33.9%  | 1                                | 18.3%   |
| 2,4-Dimethylpentane    | 1                              | 14.9%  | 1                             | 23.2%  | 0                                | 2.0%    |
| Cyclohexane            | 1                              | 7.3%   | 1                             | 35.8%  | 1                                | 24.2%   |
| 2-Methylhexane         | 1                              | 162.4% | 1                             | 35.1%  | 1                                | 13.0%   |
| 2,3-Dimethylpentane    | 1                              | 8.5%   | 1                             | 44.2%  | 0                                | 3.7%    |
| 3-Methylhexane         | 1                              | 7.9%   | 1                             | 65.4%  | 1                                | 4.7%    |
| 2,2,4-Trimethylpentane | 1                              | 23.0%  | 1                             | 22.4%  | 0                                | 3.9%    |
| n-Heptane              | 1                              | 4.5%   | 1                             | 47.3%  | 1                                | 19.8%   |
| Methylcyclohexane      | 1                              | 12.9%  | 1                             | 21.9%  | 0                                | 11.8%   |
| 2,3,4-Trimethylpentane | 1                              | 25.7%  | 1                             | 63.2%  | 0                                | 10.2%   |
| 2-Methylheptane        | 1                              | 10.5%  | 1                             | 4.8%   | 1                                | 23.6%   |
| 3-Methylheptane        | 1                              | 112.7% | 1                             | 27.6%  | 0                                | 27.1%   |
| n-Octane               | 1                              | 4.2%   | 1                             | 44.3%  | 1                                | 17.2%   |
| n-Nonane               | 1                              | 10.8%  | 1                             | 42.9%  | 1                                | 12.5%   |
| n-Decane               | 1                              | 8.5%   | 1                             | 8.8%   | 1                                | 23.9%   |
| Undecane               | 1                              | 4.7%   | 1                             | 6.6%   | 1                                | 104.1%  |
| Dodecane               | 1                              | 1.3%   | 1                             | 49.5%  | 1                                | 53.3%   |
| Ethylene               | 1                              | 133.5% | 0                             | 192.3% | 1                                | 22.5%   |
| Propylene              | 1                              | 20.1%  | 1                             | 60.8%  | 1                                | 7.0%    |
| 1-Butene               | 1                              | 28.7%  | 1                             | 74.4%  | 1                                | 9.7%    |
| trans-2-Butene         | 1                              | 25.2%  | 1                             | 71.7%  | 1                                | 3.0%    |
| cis-2-Butene           | 1                              | 31.1%  | 1                             | 72.7%  | 1                                | 0.5%    |
| Isoprene               | 1                              | 34.8%  | 1                             | 56.1%  | 1                                | 24.8%   |
| 1-Pentene              | 1                              | 13.3%  | 1                             | 62.8%  | 1                                | 23.9%   |
| trans-2-Pentene        | 1                              | 24.4%  | 1                             | 58.1%  | 1                                | 20.2%   |
| cis-2-Pentene          | 1                              | 26.1%  | 1                             | 52.6%  | 1                                | 19.3%   |
| 1-Hexene               | 1                              | 6.8%   | 1                             | 75.0%  | 1                                | 22.2%   |
| 1,3-Butadiene          | 1                              | 27.4%  | 1                             | 65.5%  | 1                                | 1.7%    |
| Benzene                | 1                              | 1.5%   | 1                             | 10.9%  | 1                                | 18.3%   |
| Toluene                | 1                              | 5.8%   | 1                             | 22.8%  | 1                                | 24.4%   |
| Ethylbenzene           | 1                              | 3.9%   | 1                             | 13.8%  | 1                                | 19.7%   |
| m-Xylene               | 1                              | 5.6%   | 1                             | 10.1%  | 0                                | 0.1%    |
| p-Xylene               | 1                              | 5.7%   | 1                             | 10.1%  | 0                                | 0.3%    |
| Styrene                | 1                              | 2.9%   | 1                             | 4.1%   | 1                                | 22.2%   |
| o-Xylene               | 1                              | 5.1%   | 1                             | 4.5%   | 1                                | 24.6%   |
| Isopropylbenzene       | 1                              | 5.3%   | 1                             | 4.8%   | 1                                | 8.8%    |
| n-Propylbenzene        | 1                              | 2.4%   | 1                             | 5.1%   | 0                                | 16.3%   |
| m-Ethyltoluene         | 1                              | 42.3%  | 1                             | 10.3%  | 1                                | 12.1%   |
| p-Ethyltoluene         | 1                              | 70.1%  | 1                             | 10.3%  | 1                                | 6.6%    |
| 1,3,5-Trimethylbenzene | 1                              | 2.9%   | 1                             | 9.0%   | 1                                | 6.4%    |
| o-Ethyltoluene         | 1                              | 0.7%   | 1                             | 13.7%  | 1                                | 8.6%    |
| 1,2,4-Trimethylbenzene | 1                              | 0.4%   | 1                             | 16.9%  | 1                                | 54.3%   |
| 1,2,3-Trimethylbenzene | 1                              | 1.4%   | 1                             | 19.5%  | 1                                | 41.7%   |
| m-Diethylbenzene       | 1                              | 25.0%  | 1                             | 15.3%  | 1                                | 49.7%   |

|                           |   |        |   |        |   |        |
|---------------------------|---|--------|---|--------|---|--------|
| p-Diethylbenzene          | 1 | 30.0%  | 1 | 157.2% | 1 | 3.7%   |
| 4-Ethyltoluene            | 1 | 0.2%   | 1 | 8.9%   | 1 | 23.7%  |
| Naphthalene               | 1 | 16.2%  | 1 | 4.3%   | 1 | 22.6%  |
| Acrolein                  | 1 | 16.2%  | 1 | 71.8%  | 1 | 0.5%   |
| Acetone                   | 1 | 17.6%  | 1 | 43.6%  | 1 | 3.4%   |
| Methyl ethyl ketone       | 1 | 0.9%   | 1 | 3.2%   | 1 | 11.9%  |
| Methyl Isobutyl Ketone    | 1 | 44.6%  | 1 | 32.2%  | 1 | 44.1%  |
| Methyl butyl ketone       | 1 | 10.5%  | 1 | 4.1%   | 1 | 24.8%  |
| Ethanol                   | 0 | 0.0%   | 1 | 200.0% | 1 | 1.4%   |
| Isopropyl Alcohol         | 1 | 2.2%   | 1 | 2.2%   | 1 | 2.2%   |
| Methyl tert-butyl ether   | 1 | 1.8%   | 1 | 3.5%   | 1 | 3.2%   |
| Ethyl Acetate             | 1 | 9.5%   | 1 | 12.4%  | 1 | 5.3%   |
| Methyl Methacrylate       | 1 | 0.8%   | 1 | 45.0%  | 0 | 3.7%   |
| Freon-12                  | 1 | 8.9%   | 1 | 8.4%   | 1 | 20.4%  |
| Chloromethane             | 1 | 27.1%  | 1 | 34.8%  | 1 | 2.2%   |
| Freon-114                 | 1 | 11.2%  | 1 | 10.1%  | 1 | 14.2%  |
| Vinyl chloride            | 1 | 5.4%   | 1 | 11.5%  | 1 | 8.3%   |
| Bromomethane              | 1 | 4.8%   | 1 | 5.7%   | 1 | 3.2%   |
| Freon-11                  | 1 | 2.6%   | 1 | 2.3%   | 1 | 2.3%   |
| 1,1-Dichloroethene        | 1 | 7.1%   | 1 | 18.9%  | 1 | 4.5%   |
| Methylene Chloride        | 1 | 16.1%  | 1 | 95.4%  | 0 | 8.9%   |
| Freon-113                 | 1 | 4.0%   | 1 | 4.1%   | 1 | 13.3%  |
| trans-1,2-Dichloroethene  | 1 | 45.5%  | 1 | 13.1%  | 1 | 4.1%   |
| 1,1-Dichloroethane        | 1 | 200.7% | 0 | 14.9%  | 0 | 0.0%   |
| cis-1,2-Dichloroethene    | 1 | 3.5%   | 1 | 50.2%  | 1 | 5.0%   |
| Chloroform                | 1 | 12.8%  | 1 | 23.4%  | 0 | 4.7%   |
| 1,2-Dichloroethane        | 1 | 28.9%  | 1 | 27.3%  | 1 | 29.2%  |
| 1,1,1-Trichloroethane     | 0 | 0.0%   | 0 | 0.0%   | 0 | 9.6%   |
| Carbon Tetrachloride      | 1 | 6.8%   | 1 | 8.4%   | 1 | 11.3%  |
| 1,2-Dichloropropane       | 0 | 278.8% | 1 | 87.5%  | 0 | 0.0%   |
| Trichloroethene           | 0 | 0.0%   | 0 | 0.0%   | 0 | 0.0%   |
| cis-1,3-Dichloropropene   | 1 | 11.7%  | 1 | 41.4%  | 0 | 4.0%   |
| 1,1,2-Trichloroethane     | 0 | 0.0%   | 0 | 0.0%   | 0 | 0.0%   |
| 1,1,2,2-Tetrachloroethane | 1 | 23.5%  | 1 | 10.0%  | 1 | 20.8%  |
| Benzyl Chloride           | 1 | 0.7%   | 1 | 0.4%   | 1 | 1.3%   |
| 1,3-Dichlorobenzene       | 1 | 3.0%   | 1 | 3.7%   | 1 | 0.9%   |
| 1,4-Dichlorobenzene       | 1 | 2.4%   | 1 | 2.8%   | 1 | 4.3%   |
| 1,2-Dichlorobenzene       | 1 | 0.4%   | 1 | 0.9%   | 1 | 0.2%   |
| Acetylene                 | 1 | 2.6%   | 1 | 21.0%  | 1 | 112.5% |
| Carbon disulfide          | 1 | 7.4%   | 1 | 45.5%  | 1 | 31.1%  |
| Tetrahydrofuran           | 1 | 135.5% | 1 | 12.2%  | 0 | 0.0%   |
| 1,4-Dioxane               | 1 | 2.2%   | 1 | 3.5%   | 1 | 2.4%   |

| No. of<br>species<br>over MDL | Average<br>Unc | No. of<br>species<br>over MDL | Average<br>Unc | No. of<br>species<br>over MDL | Average<br>Unc |
|-------------------------------|----------------|-------------------------------|----------------|-------------------------------|----------------|
| 93                            | 20.8%          | 93                            | 30.5%          | 77                            | 14.5%          |

| >MDL=1, Wheat<br><MDL=0 | straw- HK | >MDL=1, Branch -<br><MDL=0 | TS     | >MDL=1, Corn hub -<br><MDL=0 | TS     | >MDL=1, Anthracit<br><MDL=0 | e- CS  | >MDL=1,<br><MDL=0 |
|-------------------------|-----------|----------------------------|--------|------------------------------|--------|-----------------------------|--------|-------------------|
| 1                       | 24.8%     | 1                          | 136.6% | 0                            | 0.3%   | 0                           | 42.1%  | 1                 |
| 1                       | 22.7%     | 1                          | 1.2%   | 0                            | 0.3%   | 1                           | 14.4%  | 1                 |
| 1                       | 17.5%     | 1                          | 66.8%  | 0                            | 1.8%   | 1                           | 22.4%  | 1                 |
| 1                       | 15.4%     | 1                          | 14.4%  | 0                            | 0.3%   | 1                           | 15.3%  | 1                 |
| 1                       | 71.5%     | 1                          | 6.3%   | 1                            | 24.2%  | 1                           | 5.9%   | 1                 |
| 0                       | 132.5%    | 1                          | 1.6%   | 0                            | 2.6%   | 1                           | 1.1%   | 1                 |
| 0                       | 1408.6%   | 1                          | 15.5%  | 0                            | 17.8%  | 1                           | 10.6%  | 1                 |
| 1                       | 191.6%    | 0                          | 0.0%   | 0                            | 0.0%   | 0                           | 0.0%   | 0                 |
| 1                       | 187.1%    | 1                          | 45.1%  | 1                            | 16.8%  | 1                           | 120.3% | 1                 |
| 1                       | 18.9%     | 1                          | 36.3%  | 1                            | 9.2%   | 1                           | 17.4%  | 1                 |
| 1                       | 166.3%    | 1                          | 19.5%  | 1                            | 6.1%   | 1                           | 7.4%   | 1                 |
| 1                       | 200.3%    | 1                          | 13.0%  | 1                            | 6.0%   | 1                           | 2.3%   | 1                 |
| 1                       | 173.0%    | 1                          | 13.8%  | 1                            | 40.2%  | 1                           | 9.2%   | 1                 |
| 1                       | 200.8%    | 1                          | 101.2% | 1                            | 50.7%  | 1                           | 9.2%   | 1                 |
| 1                       | 191.7%    | 1                          | 24.4%  | 1                            | 125.9% | 1                           | 10.9%  | 1                 |
| 1                       | 85.1%     | 1                          | 50.0%  | 1                            | 116.7% | 1                           | 13.3%  | 1                 |
| 1                       | 143.6%    | 1                          | 13.0%  | 0                            | 26.6%  | 1                           | 24.6%  | 1                 |
| 1                       | 100.1%    | 1                          | 25.2%  | 1                            | 74.9%  | 1                           | 122.8% | 1                 |
| 0                       | 811.8%    | 1                          | 20.6%  | 1                            | 51.5%  | 0                           | 20.6%  | 1                 |
| 1                       | 87.7%     | 1                          | 13.0%  | 1                            | 91.4%  | 1                           | 6.4%   | 1                 |
| 1                       | 158.1%    | 1                          | 170.7% | 1                            | 14.2%  | 1                           | 7.1%   | 1                 |
| 1                       | 154.9%    | 0                          | 53.3%  | 1                            | 177.8% | 0                           | 28.5%  | 1                 |
| 1                       | 161.6%    | 1                          | 195.6% | 1                            | 179.9% | 1                           | 19.7%  | 1                 |
| 0                       | 106.8%    | 1                          | 16.8%  | 1                            | 198.4% | 0                           | 144.9% | 1                 |
| 1                       | 36.7%     | 1                          | 10.8%  | 1                            | 137.8% | 1                           | 5.1%   | 1                 |
| 1                       | 32.0%     | 1                          | 4.8%   | 1                            | 148.8% | 1                           | 10.9%  | 1                 |
| 1                       | 20.0%     | 1                          | 8.0%   | 1                            | 131.0% | 1                           | 9.2%   | 1                 |
| 1                       | 159.0%    | 1                          | 143.4% | 1                            | 113.8% | 1                           | 10.1%  | 1                 |
| 1                       | 19.8%     | 1                          | 32.1%  | 1                            | 108.7% | 1                           | 19.7%  | 1                 |
| 1                       | 116.6%    | 1                          | 5.8%   | 0                            | 8.4%   | 1                           | 19.9%  | 1                 |
| 1                       | 38.1%     | 1                          | 16.4%  | 0                            | 0.2%   | 1                           | 9.0%   | 1                 |
| 1                       | 154.7%    | 1                          | 0.9%   | 0                            | 0.5%   | 1                           | 20.9%  | 1                 |
| 1                       | 179.1%    | 1                          | 11.7%  | 0                            | 0.5%   | 1                           | 28.4%  | 1                 |
| 1                       | 200.0%    | 1                          | 12.2%  | 1                            | 12.9%  | 1                           | 23.4%  | 1                 |
| 1                       | 200.1%    | 1                          | 12.7%  | 0                            | 0.2%   | 1                           | 69.8%  | 1                 |
| 1                       | 190.8%    | 1                          | 21.1%  | 1                            | 14.3%  | 1                           | 31.7%  | 1                 |
| 1                       | 200.6%    | 1                          | 17.1%  | 1                            | 13.4%  | 1                           | 39.9%  | 1                 |
| 1                       | 168.6%    | 1                          | 13.8%  | 1                            | 0.8%   | 1                           | 36.1%  | 1                 |
| 1                       | 138.2%    | 1                          | 7.9%   | 1                            | 17.3%  | 1                           | 32.8%  | 1                 |
| 1                       | 3.0%      | 1                          | 14.3%  | 0                            | 0.3%   | 1                           | 47.9%  | 1                 |
| 1                       | 0.5%      | 1                          | 2.1%   | 1                            | 37.8%  | 1                           | 8.9%   | 1                 |
| 1                       | 8.0%      | 1                          | 18.6%  | 1                            | 67.8%  | 1                           | 7.7%   | 1                 |
| 1                       | 10.9%     | 1                          | 26.8%  | 1                            | 131.6% | 1                           | 16.0%  | 1                 |
| 1                       | 1.1%      | 1                          | 29.1%  | 1                            | 136.0% | 1                           | 13.9%  | 1                 |
| 1                       | 2.2%      | 1                          | 32.3%  | 1                            | 139.8% | 1                           | 15.0%  | 1                 |
| 1                       | 0.8%      | 1                          | 32.2%  | 1                            | 136.3% | 1                           | 3.2%   | 1                 |
| 1                       | 0.2%      | 1                          | 26.1%  | 1                            | 132.5% | 1                           | 11.0%  | 1                 |
| 1                       | 92.8%     | 1                          | 30.1%  | 1                            | 135.4% | 1                           | 14.9%  | 1                 |
| 1                       | 10.3%     | 1                          | 20.0%  | 1                            | 19.6%  | 1                           | 22.0%  | 1                 |
| 1                       | 1.0%      | 1                          | 2.9%   | 1                            | 125.7% | 1                           | 12.8%  | 1                 |
| 1                       | 4.4%      | 1                          | 12.4%  | 1                            | 128.5% | 1                           | 15.9%  | 1                 |
| 1                       | 4.0%      | 1                          | 24.9%  | 1                            | 119.7% | 1                           | 16.1%  | 1                 |
| 1                       | 3.2%      | 1                          | 20.8%  | 1                            | 127.0% | 1                           | 10.4%  | 1                 |
| 1                       | 13.9%     | 1                          | 9.5%   | 1                            | 130.6% | 1                           | 8.2%   | 1                 |
| 1                       | 17.5%     | 1                          | 16.9%  | 1                            | 127.4% | 1                           | 9.5%   | 1                 |
| 1                       | 13.2%     | 1                          | 22.6%  | 1                            | 116.3% | 1                           | 6.2%   | 1                 |

|   |        |   |        |   |        |   |        |   |
|---|--------|---|--------|---|--------|---|--------|---|
| 0 | 9.7%   | 1 | 3.0%   | 1 | 119.7% | 1 | 2.8%   | 1 |
| 1 | 51.8%  | 1 | 4.1%   | 1 | 73.2%  | 1 | 4.1%   | 1 |
| 1 | 92.0%  | 1 | 10.5%  | 1 | 141.1% | 1 | 9.0%   | 1 |
| 1 | 1.2%   | 1 | 2.2%   | 1 | 5.3%   | 1 | 23.5%  | 1 |
| 1 | 0.8%   | 1 | 2.4%   | 1 | 6.1%   | 1 | 20.8%  | 1 |
| 1 | 1.1%   | 1 | 1.1%   | 1 | 1.1%   | 1 | 1.5%   | 1 |
| 1 | 46.7%  | 1 | 44.6%  | 1 | 44.9%  | 1 | 45.3%  | 1 |
| 1 | 97.1%  | 1 | 8.0%   | 1 | 91.5%  | 1 | 6.9%   | 1 |
| 1 | 6.0%   | 1 | 20.3%  | 1 | 8.0%   | 1 | 31.9%  | 1 |
| 1 | 2.2%   | 1 | 2.3%   | 1 | 2.2%   | 1 | 2.2%   | 1 |
| 1 | 2.9%   | 1 | 10.9%  | 1 | 7.6%   | 1 | 1.9%   | 1 |
| 1 | 181.9% | 1 | 12.1%  | 1 | 22.0%  | 1 | 25.0%  | 1 |
| 0 | 0.0%   | 0 | 0.0%   | 1 | 199.4% | 0 | 0.0%   | 0 |
| 1 | 56.0%  | 0 | 0.0%   | 0 | 0.0%   | 0 | 0.0%   | 0 |
| 1 | 12.9%  | 1 | 0.5%   | 1 | 5.7%   | 0 | 0.0%   | 0 |
| 1 | 14.2%  | 1 | 12.7%  | 1 | 17.2%  | 1 | 12.5%  | 1 |
| 1 | 8.8%   | 1 | 8.3%   | 1 | 21.9%  | 1 | 8.9%   | 1 |
| 1 | 1.3%   | 1 | 1.4%   | 1 | 2.7%   | 1 | 4.4%   | 1 |
| 1 | 5.9%   | 1 | 3.0%   | 1 | 15.2%  | 1 | 3.5%   | 1 |
| 1 | 1.2%   | 1 | 1.2%   | 1 | 1.2%   | 1 | 1.2%   | 1 |
| 1 | 200.9% | 1 | 2.1%   | 0 | 22.5%  | 1 | 9.1%   | 1 |
| 1 | 24.0%  | 1 | 8.0%   | 1 | 5.5%   | 1 | 6.0%   | 1 |
| 1 | 3.9%   | 1 | 3.9%   | 1 | 3.9%   | 1 | 3.9%   | 1 |
| 0 | 0.0%   | 1 | 112.7% | 0 | 3.7%   | 1 | 21.7%  | 1 |
| 1 | 9.2%   | 1 | 13.2%  | 1 | 6.5%   | 1 | 1.2%   | 1 |
| 1 | 123.7% | 1 | 7.8%   | 1 | 11.8%  | 1 | 14.1%  | 1 |
| 1 | 29.0%  | 1 | 27.9%  | 1 | 27.5%  | 1 | 28.1%  | 1 |
| 0 | 0.0%   | 0 | 0.0%   | 0 | 0.0%   | 0 | 0.0%   | 0 |
| 1 | 17.3%  | 1 | 8.8%   | 1 | 6.5%   | 1 | 8.8%   | 1 |
| 0 | 0.0%   | 1 | 58.1%  | 1 | 65.7%  | 1 | 25.1%  | 1 |
| 0 | 0.0%   | 0 | 0.0%   | 0 | 0.0%   | 0 | 0.0%   | 0 |
| 1 | 200.0% | 1 | 200.4% | 1 | 126.1% | 1 | 200.5% | 1 |
| 0 | 0.0%   | 0 | 0.0%   | 0 | 0.0%   | 0 | 0.0%   | 0 |
| 1 | 47.0%  | 1 | 20.4%  | 1 | 20.8%  | 1 | 11.0%  | 1 |
| 1 | 0.5%   | 1 | 7.4%   | 1 | 62.9%  | 1 | 5.8%   | 1 |
| 1 | 9.9%   | 1 | 0.5%   | 1 | 1.3%   | 1 | 0.5%   | 1 |
| 1 | 4.4%   | 1 | 16.5%  | 1 | 7.8%   | 1 | 10.1%  | 1 |
| 1 | 0.2%   | 1 | 0.6%   | 1 | 27.8%  | 1 | 0.5%   | 1 |
| 1 | 19.3%  | 1 | 202.3% | 0 | 1.0%   | 0 | 0.0%   | 0 |
| 1 | 84.5%  | 0 | 0.0%   | 0 | 0.0%   | 0 | 0.0%   | 0 |
| 0 | 0.0%   | 1 | 29.6%  | 1 | 16.2%  | 1 | 21.2%  | 1 |
| 1 | 2.4%   | 1 | 2.5%   | 1 | 4.6%   | 1 | 4.6%   | 1 |

| No. of<br>species<br>over MDL | Average<br>Unc | No. of<br>species<br>over MDL | Average<br>Unc | No. of<br>species<br>over MDL | Average<br>Unc | No. of<br>species<br>over MDL | Average<br>Unc | No. of<br>species<br>over MDL |
|-------------------------------|----------------|-------------------------------|----------------|-------------------------------|----------------|-------------------------------|----------------|-------------------------------|
| 86                            | 58.9%          | 90                            | 25.8%          | 76                            | 49.8%          | 85                            | 16.6%          | 89                            |

| Honeyco<br>mb -CS | >MDL=1,<br><MDL=0 | Anthracit<br>eSG | >MDL=1,<<br>MDL=0 | Bitumite -<br>SG | >MDL=1,<br><MDL=0 | Firewood<br>-SG | >MDL=1,<br><MDL=0 | Branch-<br>SG |
|-------------------|-------------------|------------------|-------------------|------------------|-------------------|-----------------|-------------------|---------------|
| 200.3%            | 0                 | 7.7%             | 0                 | 0.0%             | 1                 | 202.0%          | 0                 | 0.0%          |
| 53.4%             | 1                 | 24.6%            | 1                 | 2.5%             | 1                 | 22.5%           | 1                 | 29.1%         |
| 200.0%            | 1                 | 18.1%            | 1                 | 64.3%            | 1                 | 24.8%           | 1                 | 18.6%         |
| 72.1%             | 1                 | 23.7%            | 1                 | 66.0%            | 1                 | 12.9%           | 1                 | 16.9%         |
| 49.9%             | 1                 | 23.8%            | 1                 | 9.6%             | 1                 | 24.3%           | 1                 | 20.2%         |
| 53.1%             | 1                 | 24.8%            | 1                 | 0.3%             | 1                 | 2.0%            | 1                 | 92.8%         |
| 33.5%             | 1                 | 24.8%            | 1                 | 16.1%            | 1                 | 71.1%           | 1                 | 198.4%        |
| 0.0%              | 0                 | 0.0%             | 1                 | 200.0%           | 1                 | 200.0%          | 1                 | 188.5%        |
| 106.9%            | 1                 | 7.5%             | 1                 | 20.8%            | 1                 | 67.9%           | 1                 | 10.1%         |
| 71.8%             | 1                 | 24.4%            | 1                 | 18.5%            | 1                 | 7.5%            | 1                 | 22.9%         |
| 72.8%             | 1                 | 24.5%            | 1                 | 35.1%            | 1                 | 62.3%           | 1                 | 4.6%          |
| 75.0%             | 1                 | 20.1%            | 1                 | 33.4%            | 1                 | 6.7%            | 1                 | 107.1%        |
| 43.7%             | 1                 | 19.9%            | 1                 | 55.9%            | 1                 | 47.2%           | 1                 | 91.4%         |
| 35.3%             | 1                 | 11.9%            | 1                 | 198.8%           | 1                 | 7.2%            | 1                 | 165.5%        |
| 25.0%             | 1                 | 24.8%            | 1                 | 10.2%            | 1                 | 12.7%           | 1                 | 11.4%         |
| 25.1%             | 1                 | 9.3%             | 1                 | 111.5%           | 1                 | 7.5%            | 1                 | 24.4%         |
| 31.0%             | 1                 | 23.2%            | 1                 | 4.2%             | 1                 | 6.1%            | 0                 | 24.3%         |
| 39.1%             | 1                 | 21.1%            | 1                 | 7.0%             | 1                 | 5.8%            | 1                 | 93.7%         |
| 29.8%             | 1                 | 24.7%            | 0                 | 7.2%             | 0                 | 14.4%           | 1                 | 104.0%        |
| 23.2%             | 1                 | 24.9%            | 1                 | 25.0%            | 1                 | 24.7%           | 1                 | 6.7%          |
| 32.9%             | 1                 | 24.0%            | 1                 | 18.9%            | 1                 | 3.6%            | 1                 | 87.1%         |
| 192.8%            | 1                 | 25.9%            | 0                 | 13.5%            | 0                 | 11.4%           | 0                 | 22.2%         |
| 24.2%             | 1                 | 6.3%             | 1                 | 140.8%           | 1                 | 9.1%            | 1                 | 18.7%         |
| 26.7%             | 1                 | 25.3%            | 1                 | 11.6%            | 1                 | 12.9%           | 1                 | 113.6%        |
| 31.3%             | 1                 | 24.6%            | 1                 | 14.6%            | 1                 | 13.0%           | 1                 | 7.0%          |
| 32.0%             | 1                 | 23.5%            | 1                 | 19.5%            | 1                 | 22.4%           | 1                 | 9.7%          |
| 19.5%             | 1                 | 25.0%            | 1                 | 7.1%             | 1                 | 6.9%            | 1                 | 61.9%         |
| 44.7%             | 1                 | 0.1%             | 1                 | 76.7%            | 1                 | 6.5%            | 1                 | 98.2%         |
| 46.9%             | 1                 | 36.5%            | 1                 | 14.0%            | 1                 | 7.9%            | 1                 | 9.4%          |
| 4.5%              | 1                 | 20.4%            | 1                 | 5.0%             | 1                 | 48.8%           | 0                 | 7.6%          |
| 200.1%            | 1                 | 12.4%            | 1                 | 25.0%            | 1                 | 2.5%            | 1                 | 25.0%         |
| 28.5%             | 1                 | 8.6%             | 1                 | 66.9%            | 1                 | 19.7%           | 1                 | 27.2%         |
| 41.3%             | 1                 | 18.8%            | 1                 | 9.7%             | 1                 | 12.9%           | 1                 | 47.3%         |
| 51.7%             | 1                 | 20.1%            | 1                 | 16.4%            | 1                 | 11.8%           | 1                 | 49.3%         |
| 74.4%             | 1                 | 24.6%            | 1                 | 6.1%             | 1                 | 23.5%           | 1                 | 20.6%         |
| 38.4%             | 1                 | 25.0%            | 1                 | 24.6%            | 1                 | 20.5%           | 1                 | 80.3%         |
| 59.7%             | 1                 | 23.5%            | 1                 | 23.4%            | 1                 | 21.9%           | 1                 | 12.7%         |
| 51.9%             | 1                 | 23.4%            | 1                 | 22.0%            | 1                 | 1.1%            | 1                 | 16.3%         |
| 46.9%             | 1                 | 24.5%            | 1                 | 9.0%             | 1                 | 1.8%            | 1                 | 14.7%         |
| 26.1%             | 1                 | 3.0%             | 1                 | 4.1%             | 1                 | 18.3%           | 1                 | 8.2%          |
| 33.9%             | 1                 | 25.0%            | 1                 | 8.2%             | 1                 | 12.3%           | 1                 | 8.7%          |
| 30.5%             | 1                 | 24.8%            | 1                 | 8.4%             | 1                 | 7.9%            | 1                 | 11.5%         |
| 24.6%             | 1                 | 24.3%            | 1                 | 0.0%             | 1                 | 16.7%           | 1                 | 16.0%         |
| 22.9%             | 1                 | 15.5%            | 1                 | 19.3%            | 1                 | 11.7%           | 1                 | 19.3%         |
| 24.0%             | 1                 | 22.6%            | 1                 | 25.0%            | 1                 | 16.0%           | 1                 | 15.9%         |
| 33.9%             | 1                 | 14.8%            | 1                 | 24.2%            | 1                 | 12.5%           | 1                 | 25.0%         |
| 20.6%             | 1                 | 22.1%            | 1                 | 13.6%            | 1                 | 24.9%           | 1                 | 0.1%          |
| 21.3%             | 1                 | 23.6%            | 1                 | 13.4%            | 1                 | 23.1%           | 0                 | 3.2%          |
| 25.2%             | 1                 | 21.0%            | 1                 | 13.5%            | 1                 | 22.9%           | 1                 | 89.1%         |
| 13.0%             | 1                 | 20.2%            | 1                 | 24.2%            | 1                 | 21.9%           | 1                 | 16.8%         |
| 21.9%             | 1                 | 20.2%            | 1                 | 24.5%            | 1                 | 23.4%           | 1                 | 23.3%         |
| 16.8%             | 1                 | 25.0%            | 1                 | 1.0%             | 1                 | 24.1%           | 1                 | 5.5%          |
| 23.5%             | 1                 | 18.8%            | 1                 | 22.5%            | 1                 | 23.1%           | 1                 | 18.4%         |
| 21.1%             | 1                 | 24.7%            | 1                 | 5.0%             | 1                 | 22.7%           | 1                 | 1.4%          |
| 24.6%             | 1                 | 17.9%            | 1                 | 23.5%            | 1                 | 0.9%            | 1                 | 23.0%         |
| 25.3%             | 1                 | 19.1%            | 1                 | 7.5%             | 1                 | 22.4%           | 1                 | 122.4%        |

|       |   |        |   |       |   |        |   |        |
|-------|---|--------|---|-------|---|--------|---|--------|
| 9.2%  | 1 | 21.0%  | 1 | 57.9% | 1 | 160.5% | 1 | 128.3% |
| 11.1% | 1 | 24.8%  | 1 | 18.1% | 1 | 22.0%  | 1 | 22.6%  |
| 20.2% | 1 | 13.8%  | 1 | 24.7% | 1 | 12.8%  | 1 | 12.8%  |
| 15.8% | 1 | 24.4%  | 1 | 5.3%  | 1 | 20.5%  | 1 | 18.6%  |
| 17.8% | 1 | 9.2%   | 1 | 24.2% | 1 | 13.6%  | 1 | 14.7%  |
| 45.6% | 1 | 1.1%   | 1 | 1.1%  | 1 | 1.1%   | 1 | 1.1%   |
| 43.3% | 1 | 29.3%  | 1 | 40.6% | 1 | 46.4%  | 1 | 44.9%  |
| 11.5% | 1 | 17.0%  | 1 | 23.1% | 1 | 16.0%  | 1 | 22.1%  |
| 4.3%  | 1 | 6.8%   | 1 | 19.6% | 1 | 11.0%  | 1 | 18.8%  |
| 2.2%  | 1 | 2.2%   | 1 | 2.2%  | 1 | 2.2%   | 1 | 2.2%   |
| 21.7% | 1 | 24.6%  | 1 | 20.2% | 1 | 3.4%   | 1 | 16.9%  |
| 9.8%  | 1 | 145.0% | 1 | 80.1% | 1 | 59.5%  | 1 | 21.4%  |
| 0.0%  | 0 | 13.8%  | 0 | 0.0%  | 0 | 1.0%   | 0 | 2.4%   |
| 0.0%  | 0 | 0.0%   | 0 | 0.0%  | 0 | 0.0%   | 0 | 0.0%   |
| 0.0%  | 0 | 33.0%  | 0 | 0.0%  | 0 | 188.0% | 0 | 9.5%   |
| 15.7% | 1 | 13.5%  | 1 | 20.0% | 1 | 16.8%  | 1 | 10.7%  |
| 12.9% | 1 | 7.6%   | 1 | 5.3%  | 1 | 16.1%  | 1 | 12.7%  |
| 1.6%  | 1 | 4.7%   | 1 | 1.3%  | 1 | 7.0%   | 1 | 9.0%   |
| 15.9% | 1 | 17.8%  | 1 | 16.0% | 1 | 9.6%   | 1 | 5.3%   |
| 1.2%  | 1 | 1.6%   | 1 | 1.2%  | 1 | 1.2%   | 1 | 1.2%   |
| 60.1% | 1 | 45.2%  | 1 | 53.6% | 1 | 13.0%  | 1 | 14.8%  |
| 21.5% | 1 | 23.3%  | 1 | 24.2% | 1 | 23.5%  | 1 | 17.8%  |
| 4.1%  | 1 | 3.9%   | 1 | 3.9%  | 1 | 13.6%  | 1 | 3.9%   |
| 83.8% | 1 | 25.0%  | 1 | 1.2%  | 1 | 15.8%  | 1 | 16.2%  |
| 4.5%  | 1 | 20.5%  | 1 | 18.0% | 1 | 19.1%  | 1 | 23.2%  |
| 66.7% | 1 | 23.0%  | 1 | 11.0% | 1 | 19.0%  | 1 | 24.6%  |
| 28.5% | 1 | 25.8%  | 1 | 25.0% | 1 | 28.5%  | 1 | 26.9%  |
| 0.0%  | 0 | 0.0%   | 0 | 0.0%  | 0 | 1.4%   | 0 | 0.0%   |
| 30.7% | 1 | 20.5%  | 1 | 24.0% | 1 | 15.7%  | 1 | 6.1%   |
| 43.3% | 1 | 2.7%   | 1 | 23.3% | 1 | 24.9%  | 1 | 23.7%  |
| 0.0%  | 0 | 0.0%   | 0 | 0.0%  | 0 | 0.0%   | 0 | 0.0%   |
| 27.6% | 1 | 11.8%  | 1 | 25.2% | 1 | 20.3%  | 1 | 16.5%  |
| 0.0%  | 0 | 0.0%   | 0 | 0.0%  | 0 | 0.0%   | 0 | 0.0%   |
| 12.7% | 1 | 21.2%  | 1 | 24.0% | 1 | 14.5%  | 1 | 21.9%  |
| 13.5% | 1 | 4.3%   | 1 | 7.2%  | 1 | 2.4%   | 1 | 8.0%   |
| 0.6%  | 1 | 24.6%  | 1 | 0.6%  | 1 | 24.8%  | 1 | 20.7%  |
| 22.0% | 1 | 6.0%   | 1 | 18.3% | 1 | 23.1%  | 1 | 11.4%  |
| 12.0% | 1 | 19.2%  | 1 | 13.6% | 1 | 16.2%  | 1 | 14.8%  |
| 0.0%  | 0 | 0.0%   | 0 | 0.0%  | 0 | 0.0%   | 1 | 29.4%  |
| 0.0%  | 1 | 18.5%  | 0 | 0.0%  | 0 | 7.4%   | 0 | 19.0%  |
| 40.6% | 1 | 10.6%  | 1 | 11.3% | 1 | 9.0%   | 1 | 3.3%   |
| 5.4%  | 1 | 3.0%   | 1 | 3.3%  | 1 | 4.5%   | 1 | 4.6%   |

| Average<br>Unc | No. of<br>species<br>over MDL | Average<br>Unc | No. of<br>species<br>over MDL | Average<br>Unc | No. of<br>species<br>over MDL | Average<br>Unc | No. of<br>species<br>over MDL | Average<br>Unc |
|----------------|-------------------------------|----------------|-------------------------------|----------------|-------------------------------|----------------|-------------------------------|----------------|
| 35.1%          | 89                            | 18.2%          | 87                            | 23.2%          | 88                            | 21.2%          | 86                            | 30.2%          |
